# Supplementary material
Source: publisher figshare collection journal article supplement (https://acs.figshare.com/ndownloader/files/4772992)
Supplement: Supplementary file 1 [file 4772992]

data_compound1
 
_audit_creation_method            SHELXL97
_publ_contact_author            
;
 Oscar Castillo. Departamento de Quimica Inorganica.
 Facultad de Ciencia y Tecnologia
 Universidad del Pais Vasco,  Apdo. 644, E-48080 Bilbao, Spain
;
_publ_contact_author_email       'oscar.castillo@ehu.es'
_publ_contact_author_fax         '+34-946 013 500'
_publ_contact_author_phone       '+34-946 015 991'

_publ_requested_journal          'Crystal Growth & Design'
_publ_section_title
;
Rational Desing of 2-D Magnetic Metal-Organic Coordination Polymers
Assembled from Oxalato and Dipyridyl Spacers.
;
loop_
_publ_author_name               
_publ_author_address            
'Urko Garcia-Couceiro'
;
 Departamento de Quimica Inorganica. Facultad de Ciencia y Tecnologia
 Universidad del Pais Vasco,  Apdo. 644, E-48080 Bilbao, Spain
;
'Oscar Castillo'
;
 Departamento de Quimica Inorganica. Facultad de Ciencia y Tecnologia
 Universidad del Pais Vasco,  Apdo. 644, E-48080 Bilbao, Spain
;
'Antonio Luque'
;
 Departamento de Quimica Inorganica. Facultad de Ciencia y Tecnologia
 Universidad del Pais Vasco,  Apdo. 644, E-48080 Bilbao, Spain
;
'Juan P. Garcia-Teran'
;
 Departamento de Quimica Inorganica. Facultad de Ciencia y Tecnologia
 Universidad del Pais Vasco,  Apdo. 644, E-48080 Bilbao, Spain
;
'Garikoitz Beobide'
;
 Departamento de Quimica Inorganica. Facultad de Ciencia y Tecnologia
 Universidad del Pais Vasco,  Apdo. 644, E-48080 Bilbao, Spain
;
'Pascual Roman'
;
 Departamento de Quimica Inorganica. Facultad de Ciencia y Tecnologia
 Universidad del Pais Vasco,  Apdo. 644, E-48080 Bilbao, Spain
;

_chemical_name_systematic
;
catena-[(mu-oxalato)(mu-1,2-bis(4-pyridyl)ethane)Zinc(II)]
;
_chemical_formula_moiety                 'C14 H12 N2 O4 Zn'
_chemical_formula_structural             'C14 H12 N2 O4 Zn'
_chemical_formula_sum                    'C14 H12 N2 O4 Zn'
_chemical_formula_weight                337.63
_chemical_compound_source               'synthesis as described'

 
loop_
 _atom_type_symbol
 _atom_type_description
 _atom_type_scat_dispersion_real
 _atom_type_scat_dispersion_imag
 _atom_type_scat_source
 'C'  'C'   0.0033   0.0016
 'International Tables Vol C Tables 4.2.6.8 and 6.1.1.4'
 'H'  'H'   0.0000   0.0000
 'International Tables Vol C Tables 4.2.6.8 and 6.1.1.4'
 'N'  'N'   0.0061   0.0033
 'International Tables Vol C Tables 4.2.6.8 and 6.1.1.4'
 'O'  'O'   0.0106   0.0060
 'International Tables Vol C Tables 4.2.6.8 and 6.1.1.4'
 'Zn'  'Zn'   0.2839   1.4301
 'International Tables Vol C Tables 4.2.6.8 and 6.1.1.4'

_symmetry_cell_setting                  Monoclinic
_symmetry_space_group_name_H-M          'C 2/c'
_symmetry_space_group_name_Hall         '-C 2yc'
_symmetry_Int_Tables_number             15
 
loop_
 _symmetry_equiv_pos_as_xyz
 'x, y, z'
 '-x, y, -z+1/2'
 'x+1/2, y+1/2, z'
 '-x+1/2, y+1/2, -z+1/2'
 '-x, -y, -z'
 'x, -y, z-1/2'
 '-x+1/2, -y+1/2, -z'
 'x+1/2, -y+1/2, z-1/2'
 
_cell_length_a                    9.575(2)
_cell_length_b                    13.793(2)
_cell_length_c                    10.567(2)
_cell_angle_alpha                 90.00
_cell_angle_beta                  106.02(2)
_cell_angle_gamma                 90.00
_cell_volume                      1341.4(4)
_cell_formula_units_Z             4
_cell_measurement_temperature     293(2)
_cell_measurement_reflns_used     5761
_cell_measurement_theta_min       3.57
_cell_measurement_theta_max       30.08
 
_exptl_crystal_description        prismatic
_exptl_crystal_colour             colourless
_exptl_crystal_size_max           0.21
_exptl_crystal_size_mid           0.11
_exptl_crystal_size_min           0.06
_exptl_crystal_density_meas       1.67(1)
_exptl_crystal_density_diffrn     1.672
_exptl_crystal_density_method     'flotation method'
_exptl_crystal_F_000              688
_exptl_absorpt_coefficient_mu     1.848
_exptl_absorpt_correction_type       numerical
_exptl_absorpt_process_details       
'CrysAlis RED (Oxford Diffraction, 2003)'
_exptl_absorpt_correction_T_min      0.79163
_exptl_absorpt_correction_T_max      0.91216
 
_diffrn_ambient_temperature       293(2)
_diffrn_radiation_wavelength      0.71073
_diffrn_radiation_type            MoK\a
_diffrn_radiation_source          'fine-focus sealed tube'
_diffrn_radiation_monochromator   graphite
_diffrn_measurement_device_type   'Xcalibur'
_diffrn_measurement_method        \w 
_diffrn_standards_number           0
_diffrn_standards_interval_count   0
_diffrn_standards_interval_time    0
_diffrn_standards_decay_%          0 
_diffrn_reflns_number             5761
_diffrn_reflns_av_R_equivalents   0.0468
_diffrn_reflns_av_sigmaI/netI     0.0902
_diffrn_reflns_limit_h_min        -13
_diffrn_reflns_limit_h_max        13
_diffrn_reflns_limit_k_min        -16
_diffrn_reflns_limit_k_max        19
_diffrn_reflns_limit_l_min        -14
_diffrn_reflns_limit_l_max        14
_diffrn_reflns_theta_min          3.57
_diffrn_reflns_theta_max          30.08
_reflns_number_total              1978
_reflns_number_gt                 1202
_reflns_threshold_expression      >2sigma(I)
 
_computing_data_collection              
'CrysAlis CCD (Oxford Diffraction, 2003)'
_computing_cell_refinement              
'CrysAlis CCD (Oxford Diffraction, 2003)'
_computing_data_reduction               
'CrysAlis RED (Oxford Diffraction, 2003)'
_computing_structure_solution           'Sir92 (Altamore et al., 1993)'
_computing_structure_refinement         'SHELXL-97 (Sheldrick, 1997)'
_computing_molecular_graphics           'Ortep-3 (Farrugia, 1997)'
_computing_publication_material         'WinGX (Farrugia, 1999)'
 
_refine_special_details
;
 Refinement of F^2^ against ALL reflections.  The weighted R-factor wR and
 goodness of fit S are based on F^2^, conventional R-factors R are based
 on F, with F set to zero for negative F^2^. The threshold expression of
 F^2^ > 2sigma(F^2^) is used only for calculating R-factors(gt) etc. and is
 not relevant to the choice of reflections for refinement.  R-factors based
 on F^2^ are statistically about twice as large as those based on F, and R-
 factors based on ALL data will be even larger.
;
 
_refine_ls_structure_factor_coef  Fsqd
_refine_ls_matrix_type            full
_refine_ls_weighting_scheme       calc
_refine_ls_weighting_details
 'calc w=1/[\s^2^(Fo^2^)+(0.0409P)^2^]'
_atom_sites_solution_primary      direct
_atom_sites_solution_secondary    difmap
_atom_sites_solution_hydrogens    geom
_refine_ls_hydrogen_treatment     constr
_refine_ls_extinction_method      none
_refine_ls_extinction_coef        ?
_refine_ls_number_reflns          1978
_refine_ls_number_parameters      89
_refine_ls_number_restraints      0
_refine_ls_R_factor_all           0.0813
_refine_ls_R_factor_gt            0.0467
_refine_ls_wR_factor_ref          0.0983
_refine_ls_wR_factor_gt           0.0913
_refine_ls_goodness_of_fit_ref    0.882
_refine_ls_restrained_S_all       0.882
_refine_ls_shift/su_max           0.050
_refine_ls_shift/su_mean          0.002
 
loop_
 _atom_site_label
 _atom_site_type_symbol
 _atom_site_fract_x
 _atom_site_fract_y
 _atom_site_fract_z
 _atom_site_U_iso_or_equiv
 _atom_site_adp_type
 _atom_site_occupancy
 _atom_site_symmetry_multiplicity
 _atom_site_calc_flag
 _atom_site_refinement_flags
 _atom_site_disorder_assembly
 _atom_site_disorder_group
Zn1 Zn 0.0000 0.53106(3) 0.2500 0.02841(18) Uani 1 2 d S . .
C1 C -0.0858(3) 0.50027(19) 0.4784(3) 0.0236(6) Uani 1 1 d . . .
O1 O -0.1461(2) 0.52229(14) 0.36201(17) 0.0278(5) Uani 1 1 d . . .
O2 O 0.1477(2) 0.52154(13) 0.43591(17) 0.0270(4) Uani 1 1 d . . .
N11 N 0.0015(14) 0.6888(2) 0.2388(10) 0.0281(12) Uiso 0.50 1 d P . -1
C12 C 0.0705(10) 0.7421(6) 0.3451(9) 0.042(2) Uiso 0.50 1 d P . -1
H12 H 0.1209 0.7119 0.4230 0.051 Uiso 0.50 1 calc PR . -1
C13 C 0.0653(8) 0.8442(5) 0.3363(7) 0.0386(18) Uiso 0.50 1 d P . -1
H13 H 0.1047 0.8808 0.4116 0.046 Uiso 0.50 1 calc PR . -1
C14 C 0.0021(7) 0.8916(4) 0.2172(5) 0.0231(13) Uiso 0.50 1 d P . -1
C15 C -0.0535(8) 0.8332(5) 0.1138(7) 0.0386(18) Uiso 0.50 1 d P . -1
H15 H -0.0972 0.8598 0.0316 0.046 Uiso 0.50 1 calc PR . -1
C16 C -0.0461(9) 0.7372(6) 0.1289(9) 0.036(2) Uiso 0.50 1 d P . -1
H16 H -0.0786 0.7004 0.0526 0.043 Uiso 0.50 1 calc PR . -1
C17 C 0.0081(7) 0.9995(4) 0.2020(5) 0.0310(14) Uiso 0.50 1 d P . -1
H17A H -0.0704 1.0191 0.1267 0.037 Uiso 0.50 1 calc PR . -1
H17B H 0.0989 1.0163 0.1834 0.037 Uiso 0.50 1 calc PR . -1
C18 C -0.0036(7) 1.0568(4) 0.3222(6) 0.0346(15) Uiso 0.50 1 d P . -1
H18A H -0.0933 1.0402 0.3428 0.042 Uiso 0.50 1 calc PR . -1
H18B H 0.0769 1.0403 0.3975 0.042 Uiso 0.50 1 calc PR . -1
C19 C -0.0012(7) 1.1650(4) 0.2946(5) 0.0293(14) Uiso 0.50 1 d P . -1
C20 C -0.1272(7) 1.2164(4) 0.2375(7) 0.0324(15) Uiso 0.50 1 d P . -1
H20 H -0.2155 1.1843 0.2066 0.039 Uiso 0.50 1 calc PR . -1
C21 C -0.1197(8) 1.3155(5) 0.2274(7) 0.0289(17) Uiso 0.50 1 d P . -1
H21 H -0.2067 1.3490 0.1960 0.035 Uiso 0.50 1 calc PR . -1
N22 N 0.0006(19) 1.3666(2) 0.2587(14) 0.0275(12) Uiso 0.50 1 d P . -1
C23 C 0.1220(8) 1.3154(5) 0.3171(7) 0.0285(17) Uiso 0.50 1 d P . -1
H23 H 0.2082 1.3495 0.3499 0.034 Uiso 0.50 1 calc PR . -1
C24 C 0.1259(7) 1.2177(4) 0.3307(6) 0.0330(15) Uiso 0.50 1 d P . -1
H24 H 0.2143 1.1862 0.3643 0.040 Uiso 0.50 1 calc PR . -1
 
loop_
 _atom_site_aniso_label
 _atom_site_aniso_U_11
 _atom_site_aniso_U_22
 _atom_site_aniso_U_33
 _atom_site_aniso_U_23
 _atom_site_aniso_U_13
 _atom_site_aniso_U_12
Zn1 0.0350(3) 0.0266(3) 0.0236(3) 0.000 0.0081(2) 0.000
C1 0.0253(15) 0.0202(13) 0.0240(15) -0.0023(11) 0.0047(13) 0.0014(11)
O1 0.0241(11) 0.0362(11) 0.0210(10) 0.0039(9) 0.0026(8) 0.0044(9)
O2 0.0256(11) 0.0331(11) 0.0224(10) 0.0016(9) 0.0069(9) -0.0019(9)
 
_geom_special_details
;
 All esds (except the esd in the dihedral angle between two l.s. planes)
 are estimated using the full covariance matrix.  The cell esds are taken
 into account individually in the estimation of esds in distances, angles
 and torsion angles; correlations between esds in cell parameters are only
 used when they are defined by crystal symmetry.  An approximate (isotropic)
 treatment of cell esds is used for estimating esds involving l.s. planes.
;
 
loop_
 _geom_bond_atom_site_label_1
 _geom_bond_atom_site_label_2
 _geom_bond_distance
 _geom_bond_site_symmetry_2
 _geom_bond_publ_flag
Zn1 O1 2.0708(19) 2 ?
Zn1 O1 2.0708(19) . ?
Zn1 O2 2.0839(19) . ?
Zn1 O2 2.0839(19) 2 ?
Zn1 N11 2.179(3) 2 ?
Zn1 N11 2.179(3) . ?
Zn1 N22 2.270(3) 2_545 ?
Zn1 N22 2.270(3) 1_545 ?
C1 O1 1.244(3) . ?
C1 O2 1.247(3) 5_566 ?
C1 C1 1.580(6) 5_566 ?
O2 C1 1.247(3) 5_566 ?
N11 C16 1.307(12) . ?
N11 C12 1.352(13) . ?
C12 C13 1.410(11) . ?
C12 H12 0.9300 . ?
C13 C14 1.400(9) . ?
C13 H13 0.9300 . ?
C14 C15 1.343(9) . ?
C14 C17 1.500(8) . ?
C15 C16 1.334(10) . ?
C15 H15 0.9300 . ?
C16 H16 0.9300 . ?
C17 C18 1.526(7) . ?
C17 H17A 0.9700 . ?
C17 H17B 0.9700 . ?
C18 C19 1.521(8) . ?
C18 H18A 0.9700 . ?
C18 H18B 0.9700 . ?
C19 C24 1.378(9) . ?
C19 C20 1.386(8) . ?
C20 C21 1.375(9) . ?
C20 H20 0.9300 . ?
C21 N22 1.313(16) . ?
C21 H21 0.9300 . ?
N22 C23 1.354(15) . ?
N22 Zn1 2.270(3) 1_565 ?
C23 C24 1.355(9) . ?
C23 H23 0.9300 . ?
C24 H24 0.9300 . ?
 
loop_
 _geom_angle_atom_site_label_1
 _geom_angle_atom_site_label_2
 _geom_angle_atom_site_label_3
 _geom_angle
 _geom_angle_site_symmetry_1
 _geom_angle_site_symmetry_3
 _geom_angle_publ_flag
O1 Zn1 O1 173.30(11) 2 . ?
O1 Zn1 O2 98.36(7) 2 . ?
O1 Zn1 O2 81.21(7) . . ?
O1 Zn1 O2 81.21(7) 2 2 ?
O1 Zn1 O2 98.36(7) . 2 ?
O2 Zn1 O2 172.77(10) . 2 ?
O1 Zn1 N11 96.0(3) 2 2 ?
O1 Zn1 N11 90.7(3) . 2 ?
O2 Zn1 N11 91.4(3) . 2 ?
O2 Zn1 N11 95.8(3) 2 2 ?
O1 Zn1 N11 90.7(3) 2 . ?
O1 Zn1 N11 96.0(3) . . ?
O2 Zn1 N11 95.8(3) . . ?
O2 Zn1 N11 91.4(3) 2 . ?
N11 Zn1 N11 6.5(6) 2 . ?
O1 Zn1 N22 85.0(4) 2 2_545 ?
O1 Zn1 N22 88.3(4) . 2_545 ?
O2 Zn1 N22 88.2(4) . 2_545 ?
O2 Zn1 N22 84.6(4) 2 2_545 ?
N11 Zn1 N22 178.9(5) 2 2_545 ?
N11 Zn1 N22 174.5(4) . 2_545 ?
O1 Zn1 N22 88.3(4) 2 1_545 ?
O1 Zn1 N22 85.0(4) . 1_545 ?
O2 Zn1 N22 84.6(4) . 1_545 ?
O2 Zn1 N22 88.2(4) 2 1_545 ?
N11 Zn1 N22 174.5(4) 2 1_545 ?
N11 Zn1 N22 178.9(5) . 1_545 ?
N22 Zn1 N22 4.6(7) 2_545 1_545 ?
O1 C1 O2 126.4(3) . 5_566 ?
O1 C1 C1 116.6(3) . 5_566 ?
O2 C1 C1 117.0(3) 5_566 5_566 ?
C1 O1 Zn1 112.16(18) . . ?
C1 O2 Zn1 111.39(17) 5_566 . ?
C16 N11 C12 115.5(5) . . ?
C16 N11 Zn1 123.5(7) . . ?
C12 N11 Zn1 120.5(7) . . ?
N11 C12 C13 119.2(8) . . ?
N11 C12 H12 120.4 . . ?
C13 C12 H12 120.4 . . ?
C14 C13 C12 121.6(7) . . ?
C14 C13 H13 119.2 . . ?
C12 C13 H13 119.2 . . ?
C15 C14 C13 115.3(5) . . ?
C15 C14 C17 121.7(5) . . ?
C13 C14 C17 122.7(5) . . ?
C16 C15 C14 120.1(7) . . ?
C16 C15 H15 119.9 . . ?
C14 C15 H15 119.9 . . ?
N11 C16 C15 127.4(8) . . ?
N11 C16 H16 116.3 . . ?
C15 C16 H16 116.3 . . ?
C14 C17 C18 114.3(4) . . ?
C14 C17 H17A 108.7 . . ?
C18 C17 H17A 108.7 . . ?
C14 C17 H17B 108.7 . . ?
C18 C17 H17B 108.7 . . ?
H17A C17 H17B 107.6 . . ?
C19 C18 C17 109.9(5) . . ?
C19 C18 H18A 109.7 . . ?
C17 C18 H18A 109.7 . . ?
C19 C18 H18B 109.7 . . ?
C17 C18 H18B 109.7 . . ?
H18A C18 H18B 108.2 . . ?
C24 C19 C20 116.5(5) . . ?
C24 C19 C18 121.6(6) . . ?
C20 C19 C18 121.8(6) . . ?
C21 C20 C19 119.0(6) . . ?
C21 C20 H20 120.5 . . ?
C19 C20 H20 120.5 . . ?
N22 C21 C20 125.1(7) . . ?
N22 C21 H21 117.4 . . ?
C20 C21 H21 117.4 . . ?
C21 N22 C23 114.7(4) . . ?
C21 N22 Zn1 122.3(9) . 1_565 ?
C23 N22 Zn1 122.2(9) . 1_565 ?
C24 C23 N22 124.2(7) . . ?
C24 C23 H23 117.9 . . ?
N22 C23 H23 117.9 . . ?
C23 C24 C19 119.9(6) . . ?
C23 C24 H24 120.0 . . ?
C19 C24 H24 120.0 . . ?
 
loop_
 _geom_hbond_atom_site_label_D
 _geom_hbond_atom_site_label_H
 _geom_hbond_atom_site_label_A
 _geom_hbond_distance_DH
 _geom_hbond_distance_HA
 _geom_hbond_distance_DA
 _geom_hbond_angle_DHA
 _geom_hbond_site_symmetry_A
C13 H13 O2  0.93 2.81 3.623(7) 146.0 7_566
C15 H15 O2  0.93 2.88 3.573(7) 132.2 8_465
C20 H20 O1  0.93 2.60 3.424(7) 148.4 4_455
C24 H24 O1  0.93 2.63 3.426(7) 144.0 3
 
_diffrn_measured_fraction_theta_max    0.997
_diffrn_reflns_theta_full              30.08
_diffrn_measured_fraction_theta_full   0.997
_refine_diff_density_max    0.735
_refine_diff_density_min   -0.331
_refine_diff_density_rms    0.100

#===END

data_compound3
 
_audit_creation_method            SHELXL97
_publ_contact_author            
;
 Oscar Castillo. Departamento de Quimica Inorganica.
 Facultad de Ciencia y Tecnologia
 Universidad del Pais Vasco,  Apdo. 644, E-48080 Bilbao, Spain
;
_publ_contact_author_email       'oscar.castillo@ehu.es'
_publ_contact_author_fax         '+34-946 013 500'
_publ_contact_author_phone       '+34-946 015 991'

_publ_requested_journal          'Crystal Growth & Design'
_publ_section_title
;
Rational Desing of 2-D Magnetic Metal-Organic Coordination Polymers
Assembled from Oxalato and Dipyridyl Spacers.
;
loop_
_publ_author_name               
_publ_author_address            
'Urko Garcia-Couceiro'
;
 Departamento de Quimica Inorganica. Facultad de Ciencia y Tecnologia
 Universidad del Pais Vasco,  Apdo. 644, E-48080 Bilbao, Spain
;
'Oscar Castillo'
;
 Departamento de Quimica Inorganica. Facultad de Ciencia y Tecnologia
 Universidad del Pais Vasco,  Apdo. 644, E-48080 Bilbao, Spain
;
'Antonio Luque'
;
 Departamento de Quimica Inorganica. Facultad de Ciencia y Tecnologia
 Universidad del Pais Vasco,  Apdo. 644, E-48080 Bilbao, Spain
;
'Juan P. Garcia-Teran'
;
 Departamento de Quimica Inorganica. Facultad de Ciencia y Tecnologia
 Universidad del Pais Vasco,  Apdo. 644, E-48080 Bilbao, Spain
;
'Garikoitz Beobide'
;
 Departamento de Quimica Inorganica. Facultad de Ciencia y Tecnologia
 Universidad del Pais Vasco,  Apdo. 644, E-48080 Bilbao, Spain
;
'Pascual Roman'
;
 Departamento de Quimica Inorganica. Facultad de Ciencia y Tecnologia
 Universidad del Pais Vasco,  Apdo. 644, E-48080 Bilbao, Spain
;

_chemical_name_systematic
;
catena-[(mu-oxalato)(mu-1,2-bis(4-pyridyl)ethane)Manganese(II)]
;
_chemical_formula_moiety                 'C14 H12 Mn N2 O4'
_chemical_formula_structural             'C14 H12 Mn N2 O4'
_chemical_formula_sum                    'C14 H12 Mn N2 O4'
_chemical_formula_weight                327.20
_chemical_compound_source               'synthesis as described'

 
loop_
 _atom_type_symbol
 _atom_type_description
 _atom_type_scat_dispersion_real
 _atom_type_scat_dispersion_imag
 _atom_type_scat_source
 'C'  'C'   0.0033   0.0016
 'International Tables Vol C Tables 4.2.6.8 and 6.1.1.4'
 'H'  'H'   0.0000   0.0000
 'International Tables Vol C Tables 4.2.6.8 and 6.1.1.4'
 'N'  'N'   0.0061   0.0033
 'International Tables Vol C Tables 4.2.6.8 and 6.1.1.4'
 'O'  'O'   0.0106   0.0060
 'International Tables Vol C Tables 4.2.6.8 and 6.1.1.4'
 'Mn'  'Mn'   0.3368   0.7283
 'International Tables Vol C Tables 4.2.6.8 and 6.1.1.4'

_symmetry_cell_setting                  Monoclinic
_symmetry_space_group_name_H-M          'C 2/c'
_symmetry_space_group_name_Hall         '-C 2yc'
_symmetry_Int_Tables_number             15
 
loop_
 _symmetry_equiv_pos_as_xyz
 'x, y, z'
 '-x, y, -z+1/2'
 'x+1/2, y+1/2, z'
 '-x+1/2, y+1/2, -z+1/2'
 '-x, -y, -z'
 'x, -y, z-1/2'
 '-x+1/2, -y+1/2, -z'
 'x+1/2, -y+1/2, z-1/2'
 
_cell_length_a                    9.485(3)
_cell_length_b                    13.935(4)
_cell_length_c                    10.987(3)
_cell_angle_alpha                 90.00
_cell_angle_beta                  105.22(3)
_cell_angle_gamma                 90.00
_cell_volume                      1401.3(7)
_cell_formula_units_Z             4
_cell_measurement_temperature     293(2)
_cell_measurement_reflns_used     5998
_cell_measurement_theta_min       3.50
_cell_measurement_theta_max       30.05
 
_exptl_crystal_description        prismatic
_exptl_crystal_colour             colourless
_exptl_crystal_size_max           0.14
_exptl_crystal_size_mid           0.12
_exptl_crystal_size_min           0.07
_exptl_crystal_density_meas       1.56(1)
_exptl_crystal_density_diffrn     1.551
_exptl_crystal_density_method     'flotation method'
_exptl_crystal_F_000              668
_exptl_absorpt_coefficient_mu     0.958
_exptl_absorpt_correction_type       numerical
_exptl_absorpt_process_details       
'CrysAlis RED (Oxford Diffraction, 2003)'
_exptl_absorpt_correction_T_min      0.88143
_exptl_absorpt_correction_T_max      0.93711
 
_diffrn_ambient_temperature       293(2)
_diffrn_radiation_wavelength      0.71073
_diffrn_radiation_type            MoK\a
_diffrn_radiation_source          'fine-focus sealed tube'
_diffrn_radiation_monochromator   graphite
_diffrn_measurement_device_type   'Xcalibur'
_diffrn_measurement_method        \w 
_diffrn_standards_number           0
_diffrn_standards_interval_count   0
_diffrn_standards_interval_time    0
_diffrn_standards_decay_%          0 
_diffrn_reflns_number             5998
_diffrn_reflns_av_R_equivalents   0.0461
_diffrn_reflns_av_sigmaI/netI     0.1395
_diffrn_reflns_limit_h_min        -9
_diffrn_reflns_limit_h_max        13
_diffrn_reflns_limit_k_min        -19
_diffrn_reflns_limit_k_max        19
_diffrn_reflns_limit_l_min        -15
_diffrn_reflns_limit_l_max        15
_diffrn_reflns_theta_min          3.50
_diffrn_reflns_theta_max          30.05
_reflns_number_total              2051
_reflns_number_gt                 895
_reflns_threshold_expression      >2sigma(I)
 
_computing_data_collection              
'CrysAlis CCD (Oxford Diffraction, 2003)'
_computing_cell_refinement              
'CrysAlis CCD (Oxford Diffraction, 2003)'
_computing_data_reduction               
'CrysAlis RED (Oxford Diffraction, 2003)'
_computing_structure_solution           'Sir92 (Altamore et al., 1993)'
_computing_structure_refinement         'SHELXL-97 (Sheldrick, 1997)'
_computing_molecular_graphics           'Ortep-3 (Farrugia, 1997)'
_computing_publication_material         'WinGX (Farrugia, 1999)'
 
_refine_special_details
;
 Refinement of F^2^ against ALL reflections.  The weighted R-factor wR and
 goodness of fit S are based on F^2^, conventional R-factors R are based
 on F, with F set to zero for negative F^2^. The threshold expression of
 F^2^ > 2sigma(F^2^) is used only for calculating R-factors(gt) etc. and is
 not relevant to the choice of reflections for refinement.  R-factors based
 on F^2^ are statistically about twice as large as those based on F, and R-
 factors based on ALL data will be even larger.
;
 
_refine_ls_structure_factor_coef  Fsqd
_refine_ls_matrix_type            full
_refine_ls_weighting_scheme       calc
_refine_ls_weighting_details
 'calc w=1/[\s^2^(Fo^2^)+(0.0277P)^2^]'
_atom_sites_solution_primary      direct
_atom_sites_solution_secondary    difmap
_atom_sites_solution_hydrogens    geom
_refine_ls_hydrogen_treatment     constr
_refine_ls_extinction_method      none
_refine_ls_extinction_coef        ?
_refine_ls_number_reflns          2051
_refine_ls_number_parameters      89
_refine_ls_number_restraints      0
_refine_ls_R_factor_all           0.1292
_refine_ls_R_factor_gt            0.0466
_refine_ls_wR_factor_ref          0.0847
_refine_ls_wR_factor_gt           0.0708
_refine_ls_goodness_of_fit_ref    0.757
_refine_ls_restrained_S_all       0.757
_refine_ls_shift/su_max           0.002
_refine_ls_shift/su_mean          0.000
 
loop_
 _atom_site_label
 _atom_site_type_symbol
 _atom_site_fract_x
 _atom_site_fract_y
 _atom_site_fract_z
 _atom_site_U_iso_or_equiv
 _atom_site_adp_type
 _atom_site_occupancy
 _atom_site_symmetry_multiplicity
 _atom_site_calc_flag
 _atom_site_refinement_flags
 _atom_site_disorder_assembly
 _atom_site_disorder_group
Mn1 Mn 0.0000 0.53028(4) 0.2500 0.0320(2) Uani 1 2 d S . .
C1 C -0.0854(3) 0.49997(16) 0.4803(3) 0.0276(6) Uani 1 1 d . . .
O1 O -0.14708(18) 0.52154(13) 0.36839(15) 0.0350(5) Uani 1 1 d . . .
O2 O 0.14818(18) 0.52192(13) 0.43642(15) 0.0336(5) Uani 1 1 d . . .
N11 N 0.0132(11) 0.6933(2) 0.2451(11) 0.0355(13) Uiso 0.50 1 d P . -1
C12 C 0.0732(9) 0.7450(6) 0.3399(8) 0.049(3) Uiso 0.50 1 d P . -1
H12 H 0.1195 0.7155 0.4157 0.059 Uiso 0.50 1 calc PR . -1
C13 C 0.0713(7) 0.8463(5) 0.3328(7) 0.0401(18) Uiso 0.50 1 d P . -1
H13 H 0.1148 0.8821 0.4042 0.048 Uiso 0.50 1 calc PR . -1
C14 C 0.0048(7) 0.8934(3) 0.2196(5) 0.0250(13) Uiso 0.50 1 d P . -1
C15 C -0.0510(7) 0.8392(5) 0.1186(7) 0.0424(18) Uiso 0.50 1 d P . -1
H15 H -0.0928 0.8664 0.0401 0.051 Uiso 0.50 1 calc PR . -1
C16 C -0.0442(9) 0.7426(6) 0.1353(8) 0.042(2) Uiso 0.50 1 d P . -1
H16 H -0.0829 0.7056 0.0639 0.051 Uiso 0.50 1 calc PR . -1
C17 C 0.0108(7) 1.0014(4) 0.2059(5) 0.0371(16) Uiso 0.50 1 d P . -1
H17A H 0.1036 1.0182 0.1899 0.045 Uiso 0.50 1 calc PR . -1
H17B H -0.0659 1.0207 0.1327 0.045 Uiso 0.50 1 calc PR . -1
C18 C -0.0059(7) 1.0576(4) 0.3187(5) 0.0402(16) Uiso 0.50 1 d P . -1
H18A H 0.0726 1.0409 0.3919 0.048 Uiso 0.50 1 calc PR . -1
H18B H -0.0978 1.0409 0.3364 0.048 Uiso 0.50 1 calc PR . -1
C19 C -0.0024(7) 1.1650(4) 0.2947(4) 0.0329(14) Uiso 0.50 1 d P . -1
C20 C -0.1258(6) 1.2155(4) 0.2342(6) 0.0386(15) Uiso 0.50 1 d P . -1
H20 H -0.2128 1.1831 0.1997 0.046 Uiso 0.50 1 calc PR . -1
C21 C -0.1207(7) 1.3132(4) 0.2249(6) 0.0331(17) Uiso 0.50 1 d P . -1
H21 H -0.2069 1.3463 0.1897 0.040 Uiso 0.50 1 calc PR . -1
N22 N 0.0032(12) 1.3631(2) 0.2642(8) 0.0291(12) Uiso 0.50 1 d P . -1
C23 C 0.1175(7) 1.3132(4) 0.3235(6) 0.0331(18) Uiso 0.50 1 d P . -1
H23 H 0.2031 1.3470 0.3585 0.040 Uiso 0.50 1 calc PR . -1
C24 C 0.1219(7) 1.2160(4) 0.3384(6) 0.0405(16) Uiso 0.50 1 d P . -1
H24 H 0.2089 1.1853 0.3779 0.049 Uiso 0.50 1 calc PR . -1
 
loop_
 _atom_site_aniso_label
 _atom_site_aniso_U_11
 _atom_site_aniso_U_22
 _atom_site_aniso_U_33
 _atom_site_aniso_U_23
 _atom_site_aniso_U_13
 _atom_site_aniso_U_12
Mn1 0.0466(4) 0.0239(3) 0.0255(4) 0.000 0.0096(3) 0.000
C1 0.0309(15) 0.0254(15) 0.0254(15) -0.0022(11) 0.0056(14) 0.0017(12)
O1 0.0298(11) 0.0500(12) 0.0230(10) 0.0058(9) 0.0032(8) 0.0051(10)
O2 0.0316(11) 0.0433(12) 0.0265(10) 0.0014(9) 0.0088(9) -0.0027(9)
 
_geom_special_details
;
 All esds (except the esd in the dihedral angle between two l.s. planes)
 are estimated using the full covariance matrix.  The cell esds are taken
 into account individually in the estimation of esds in distances, angles
 and torsion angles; correlations between esds in cell parameters are only
 used when they are defined by crystal symmetry.  An approximate (isotropic)
 treatment of cell esds is used for estimating esds involving l.s. planes.
;
 
loop_
 _geom_bond_atom_site_label_1
 _geom_bond_atom_site_label_2
 _geom_bond_distance
 _geom_bond_site_symmetry_2
 _geom_bond_publ_flag
Mn1 O1 2.1462(18) . ?
Mn1 O1 2.1462(18) 2 ?
Mn1 O2 2.1616(18) . ?
Mn1 O2 2.1616(18) 2 ?
Mn1 N11 2.277(3) . ?
Mn1 N11 2.277(3) 2 ?
Mn1 N22 2.334(3) 2_545 ?
Mn1 N22 2.334(3) 1_545 ?
C1 O1 1.252(3) . ?
C1 O2 1.253(3) 5_566 ?
C1 C1 1.563(5) 5_566 ?
O2 C1 1.253(3) 5_566 ?
N11 C12 1.271(12) . ?
N11 C16 1.371(12) . ?
C12 C13 1.413(10) . ?
C12 H12 0.9300 . ?
C13 C14 1.402(9) . ?
C13 H13 0.9300 . ?
C14 C15 1.331(8) . ?
C14 C17 1.515(6) . ?
C15 C16 1.358(9) . ?
C15 H15 0.9300 . ?
C16 H16 0.9300 . ?
C17 C18 1.510(6) . ?
C17 H17A 0.9700 . ?
C17 H17B 0.9700 . ?
C18 C19 1.521(7) . ?
C18 H18A 0.9700 . ?
C18 H18B 0.9700 . ?
C19 C24 1.352(7) . ?
C19 C20 1.378(7) . ?
C20 C21 1.367(7) . ?
C20 H20 0.9300 . ?
C21 N22 1.336(11) . ?
C21 H21 0.9300 . ?
N22 C23 1.308(10) . ?
N22 Mn1 2.334(3) 1_565 ?
C23 C24 1.364(7) . ?
C23 H23 0.9300 . ?
C24 H24 0.9300 . ?
 
loop_
 _geom_angle_atom_site_label_1
 _geom_angle_atom_site_label_2
 _geom_angle_atom_site_label_3
 _geom_angle
 _geom_angle_site_symmetry_1
 _geom_angle_site_symmetry_3
 _geom_angle_publ_flag
O1 Mn1 O1 173.49(10) . 2 ?
O1 Mn1 O2 77.70(7) . . ?
O1 Mn1 O2 101.94(7) 2 . ?
O1 Mn1 O2 101.94(7) . 2 ?
O1 Mn1 O2 77.70(7) 2 2 ?
O2 Mn1 O2 173.82(10) . 2 ?
O1 Mn1 N11 96.9(3) . . ?
O1 Mn1 N11 89.7(3) 2 . ?
O2 Mn1 N11 92.9(3) . . ?
O2 Mn1 N11 93.3(3) 2 . ?
O1 Mn1 N11 89.7(3) . 2 ?
O1 Mn1 N11 96.9(3) 2 2 ?
O2 Mn1 N11 93.3(3) . 2 ?
O2 Mn1 N11 92.9(3) 2 2 ?
N11 Mn1 N11 7.5(5) . 2 ?
O1 Mn1 N22 89.1(3) . 2_545 ?
O1 Mn1 N22 84.4(3) 2 2_545 ?
O2 Mn1 N22 90.2(2) . 2_545 ?
O2 Mn1 N22 83.6(2) 2 2_545 ?
N11 Mn1 N22 173.7(3) . 2_545 ?
N11 Mn1 N22 176.0(4) 2 2_545 ?
O1 Mn1 N22 84.4(3) . 1_545 ?
O1 Mn1 N22 89.1(3) 2 1_545 ?
O2 Mn1 N22 83.6(2) . 1_545 ?
O2 Mn1 N22 90.2(2) 2 1_545 ?
N11 Mn1 N22 176.0(4) . 1_545 ?
N11 Mn1 N22 173.7(3) 2 1_545 ?
N22 Mn1 N22 7.4(4) 2_545 1_545 ?
O1 C1 O2 125.9(2) . 5_566 ?
O1 C1 C1 117.1(3) . 5_566 ?
O2 C1 C1 117.1(3) 5_566 5_566 ?
C1 O1 Mn1 113.47(17) . . ?
C1 O2 Mn1 112.91(16) 5_566 . ?
C12 N11 C16 115.2(4) . . ?
C12 N11 Mn1 124.2(7) . . ?
C16 N11 Mn1 120.6(7) . . ?
N11 C12 C13 121.7(8) . . ?
N11 C12 H12 119.2 . . ?
C13 C12 H12 119.2 . . ?
C14 C13 C12 120.8(7) . . ?
C14 C13 H13 119.6 . . ?
C12 C13 H13 119.6 . . ?
C15 C14 C13 117.5(5) . . ?
C15 C14 C17 119.8(5) . . ?
C13 C14 C17 122.3(5) . . ?
C14 C15 C16 117.1(6) . . ?
C14 C15 H15 121.4 . . ?
C16 C15 H15 121.4 . . ?
C15 C16 N11 127.5(7) . . ?
C15 C16 H16 116.2 . . ?
N11 C16 H16 116.2 . . ?
C18 C17 C14 114.8(4) . . ?
C18 C17 H17A 108.6 . . ?
C14 C17 H17A 108.6 . . ?
C18 C17 H17B 108.6 . . ?
C14 C17 H17B 108.6 . . ?
H17A C17 H17B 107.6 . . ?
C17 C18 C19 110.9(4) . . ?
C17 C18 H18A 109.5 . . ?
C19 C18 H18A 109.5 . . ?
C17 C18 H18B 109.5 . . ?
C19 C18 H18B 109.5 . . ?
H18A C18 H18B 108.0 . . ?
C24 C19 C20 117.0(5) . . ?
C24 C19 C18 120.8(5) . . ?
C20 C19 C18 122.1(5) . . ?
C21 C20 C19 120.2(6) . . ?
C21 C20 H20 119.9 . . ?
C19 C20 H20 119.9 . . ?
N22 C21 C20 122.7(6) . . ?
N22 C21 H21 118.7 . . ?
C20 C21 H21 118.7 . . ?
C23 N22 C21 115.3(4) . . ?
C23 N22 Mn1 123.9(6) . 1_565 ?
C21 N22 Mn1 120.2(6) . 1_565 ?
N22 C23 C24 125.7(6) . . ?
N22 C23 H23 117.2 . . ?
C24 C23 H23 117.2 . . ?
C19 C24 C23 118.9(6) . . ?
C19 C24 H24 120.5 . . ?
C23 C24 H24 120.5 . . ?
 
loop_
 _geom_hbond_atom_site_label_D
 _geom_hbond_atom_site_label_H
 _geom_hbond_atom_site_label_A
 _geom_hbond_distance_DH
 _geom_hbond_distance_HA
 _geom_hbond_distance_DA
 _geom_hbond_angle_DHA
 _geom_hbond_site_symmetry_A
C13 H13 O2  0.93 2.80 3.651(7) 152.6 7_566
C15 H15 O2  0.93 2.87 3.591(7) 134.8 8_465
C20 H20 O1  0.93 2.62 3.456(6) 149.7 4_455
C24 H24 O1  0.93 2.68 3.446(6) 140.7 3
 
_diffrn_measured_fraction_theta_max    0.998
_diffrn_reflns_theta_full              30.05
_diffrn_measured_fraction_theta_full   0.998
_refine_diff_density_max    0.509
_refine_diff_density_min   -0.303
_refine_diff_density_rms    0.072

#===END

data_compound4
 
_audit_creation_method            SHELXL97
_publ_contact_author            
;
 Oscar Castillo. Departamento de Quimica Inorganica.
 Facultad de Ciencia y Tecnologia
 Universidad del Pais Vasco,  Apdo. 644, E-48080 Bilbao, Spain
;
_publ_contact_author_email       'oscar.castillo@ehu.es'
_publ_contact_author_fax         '+34-946 013 500'
_publ_contact_author_phone       '+34-946 015 991'

_publ_requested_journal          'Crystal Growth & Design'
_publ_section_title
;
Rational Desing of 2-D Magnetic Metal-Organic Coordination Polymers
Assembled from Oxalato and Dipyridyl Spacers.
;
loop_
_publ_author_name               
_publ_author_address            
'Urko Garcia-Couceiro'
;
 Departamento de Quimica Inorganica. Facultad de Ciencia y Tecnologia
 Universidad del Pais Vasco,  Apdo. 644, E-48080 Bilbao, Spain
;
'Oscar Castillo'
;
 Departamento de Quimica Inorganica. Facultad de Ciencia y Tecnologia
 Universidad del Pais Vasco,  Apdo. 644, E-48080 Bilbao, Spain
;
'Antonio Luque'
;
 Departamento de Quimica Inorganica. Facultad de Ciencia y Tecnologia
 Universidad del Pais Vasco,  Apdo. 644, E-48080 Bilbao, Spain
;
'Juan P. Garcia-Teran'
;
 Departamento de Quimica Inorganica. Facultad de Ciencia y Tecnologia
 Universidad del Pais Vasco,  Apdo. 644, E-48080 Bilbao, Spain
;
'Garikoitz Beobide'
;
 Departamento de Quimica Inorganica. Facultad de Ciencia y Tecnologia
 Universidad del Pais Vasco,  Apdo. 644, E-48080 Bilbao, Spain
;
'Pascual Roman'
;
 Departamento de Quimica Inorganica. Facultad de Ciencia y Tecnologia
 Universidad del Pais Vasco,  Apdo. 644, E-48080 Bilbao, Spain
;

_chemical_name_systematic
;
catena-[(mu-oxalato)(mu-1,2-bis(4-pyridyl)ethane)Iron(II)]
;
_chemical_formula_moiety                 'C14 H12 Fe N2 O4'
_chemical_formula_structural             'C14 H12 Fe N2 O4'
_chemical_formula_sum                    'C14 H12 Fe N2 O4'
_chemical_formula_weight                328.11
_chemical_compound_source               'synthesis as described'

 
loop_
 _atom_type_symbol
 _atom_type_description
 _atom_type_scat_dispersion_real
 _atom_type_scat_dispersion_imag
 _atom_type_scat_source
 'C'  'C'   0.0033   0.0016
 'International Tables Vol C Tables 4.2.6.8 and 6.1.1.4'
 'H'  'H'   0.0000   0.0000
 'International Tables Vol C Tables 4.2.6.8 and 6.1.1.4'
 'N'  'N'   0.0061   0.0033
 'International Tables Vol C Tables 4.2.6.8 and 6.1.1.4'
 'O'  'O'   0.0106   0.0060
 'International Tables Vol C Tables 4.2.6.8 and 6.1.1.4'
 'Fe'  'Fe'   0.3463   0.8444
 'International Tables Vol C Tables 4.2.6.8 and 6.1.1.4'

_symmetry_cell_setting                  Monoclinic
_symmetry_space_group_name_H-M          'C 2/c'
_symmetry_space_group_name_Hall         '-C 2yc'
_symmetry_Int_Tables_number             15
 
loop_
 _symmetry_equiv_pos_as_xyz
 'x, y, z'
 '-x, y, -z+1/2'
 'x+1/2, y+1/2, z'
 '-x+1/2, y+1/2, -z+1/2'
 '-x, -y, -z'
 'x, -y, z-1/2'
 '-x+1/2, -y+1/2, -z'
 'x+1/2, -y+1/2, z-1/2'
 
_cell_length_a                    9.5700(10)
_cell_length_b                    13.7770(10)
_cell_length_c                    10.8200(10)
_cell_angle_alpha                 90.00
_cell_angle_beta                  106.010(10)
_cell_angle_gamma                 90.00
_cell_volume                      1371.2(2)
_cell_formula_units_Z             4
_cell_measurement_temperature     293(2)
_cell_measurement_reflns_used     6008
_cell_measurement_theta_min       3.55
_cell_measurement_theta_max       30.08
 
_exptl_crystal_description        prismatic
_exptl_crystal_colour             Red
_exptl_crystal_size_max           0.13
_exptl_crystal_size_mid           0.10
_exptl_crystal_size_min           0.07
_exptl_crystal_density_meas       1.60(1)
_exptl_crystal_density_diffrn     1.589
_exptl_crystal_density_method     'flotation method'
_exptl_crystal_F_000              672
_exptl_absorpt_coefficient_mu     1.117
_exptl_absorpt_correction_type       numerical
_exptl_absorpt_process_details       
'CrysAlis RED (Oxford Diffraction, 2003)'
_exptl_absorpt_correction_T_min      0.87520
_exptl_absorpt_correction_T_max      0.91406
 
_diffrn_ambient_temperature       293(2)
_diffrn_radiation_wavelength      0.71073
_diffrn_radiation_type            MoK\a
_diffrn_radiation_source          'fine-focus sealed tube'
_diffrn_radiation_monochromator   graphite
_diffrn_measurement_device_type   'Xcalibur'
_diffrn_measurement_method        \w 
_diffrn_standards_number           0
_diffrn_standards_interval_count   0
_diffrn_standards_interval_time    0
_diffrn_standards_decay_%          0 
_diffrn_reflns_number             6008
_diffrn_reflns_av_R_equivalents   0.0330
_diffrn_reflns_av_sigmaI/netI     0.0765
_diffrn_reflns_limit_h_min        -13
_diffrn_reflns_limit_h_max        13
_diffrn_reflns_limit_k_min        -19
_diffrn_reflns_limit_k_max        19
_diffrn_reflns_limit_l_min        -15
_diffrn_reflns_limit_l_max        9
_diffrn_reflns_theta_min          3.55
_diffrn_reflns_theta_max          30.08
_reflns_number_total              2012
_reflns_number_gt                 1197
_reflns_threshold_expression      >2sigma(I)
 
_computing_data_collection              
'CrysAlis CCD (Oxford Diffraction, 2003)'
_computing_cell_refinement              
'CrysAlis CCD (Oxford Diffraction, 2003)'
_computing_data_reduction               
'CrysAlis RED (Oxford Diffraction, 2003)'
_computing_structure_solution           'Sir92 (Altamore et al., 1993)'
_computing_structure_refinement         'SHELXL-97 (Sheldrick, 1997)'
_computing_molecular_graphics           'Ortep-3 (Farrugia, 1997)'
_computing_publication_material         'WinGX (Farrugia, 1999)'
 
_refine_special_details
;
 Refinement of F^2^ against ALL reflections.  The weighted R-factor wR and
 goodness of fit S are based on F^2^, conventional R-factors R are based
 on F, with F set to zero for negative F^2^. The threshold expression of
 F^2^ > 2sigma(F^2^) is used only for calculating R-factors(gt) etc. and is
 not relevant to the choice of reflections for refinement.  R-factors based
 on F^2^ are statistically about twice as large as those based on F, and R-
 factors based on ALL data will be even larger.
;
 
_refine_ls_structure_factor_coef  Fsqd
_refine_ls_matrix_type            full
_refine_ls_weighting_scheme       calc
_refine_ls_weighting_details
 'calc w=1/[\s^2^(Fo^2^)+(0.0634P)^2^]'
_atom_sites_solution_primary      direct
_atom_sites_solution_secondary    difmap
_atom_sites_solution_hydrogens    geom
_refine_ls_hydrogen_treatment     constr
_refine_ls_extinction_method      none
_refine_ls_extinction_coef        ?
_refine_ls_number_reflns          2012
_refine_ls_number_parameters      89
_refine_ls_number_restraints      0
_refine_ls_R_factor_all           0.1064
_refine_ls_R_factor_gt            0.0525
_refine_ls_wR_factor_ref          0.1366
_refine_ls_wR_factor_gt           0.1191
_refine_ls_goodness_of_fit_ref    0.965
_refine_ls_restrained_S_all       0.965
_refine_ls_shift/su_max           0.000
_refine_ls_shift/su_mean          0.000
 
loop_
 _atom_site_label
 _atom_site_type_symbol
 _atom_site_fract_x
 _atom_site_fract_y
 _atom_site_fract_z
 _atom_site_U_iso_or_equiv
 _atom_site_adp_type
 _atom_site_occupancy
 _atom_site_symmetry_multiplicity
 _atom_site_calc_flag
 _atom_site_refinement_flags
 _atom_site_disorder_assembly
 _atom_site_disorder_group
Fe1 Fe 0.0000 0.52764(4) 0.2500 0.0309(2) Uani 1 2 d S . .
C1 C -0.0857(3) 0.5002(2) 0.4785(3) 0.0283(7) Uani 1 1 d . . .
O1 O -0.1452(2) 0.52080(16) 0.3644(2) 0.0338(5) Uani 1 1 d . . .
O2 O 0.1472(2) 0.51994(15) 0.4371(2) 0.0331(5) Uani 1 1 d . . .
N11 N -0.0005(15) 0.6879(3) 0.2377(10) 0.0335(13) Uiso 0.50 1 d P . -1
C12 C 0.0721(10) 0.7404(7) 0.3423(9) 0.046(2) Uiso 0.50 1 d P . -1
H12 H 0.1231 0.7095 0.4176 0.055 Uiso 0.50 1 calc PR . -1
C13 C 0.0685(9) 0.8424(6) 0.3342(8) 0.0447(19) Uiso 0.50 1 d P . -1
H13 H 0.1102 0.8787 0.4076 0.054 Uiso 0.50 1 calc PR . -1
C14 C 0.0038(8) 0.8907(4) 0.2185(5) 0.0277(14) Uiso 0.50 1 d P . -1
C15 C -0.0520(9) 0.8343(6) 0.1165(8) 0.0449(19) Uiso 0.50 1 d P . -1
H15 H -0.0954 0.8616 0.0365 0.054 Uiso 0.50 1 calc PR . -1
C16 C -0.0444(10) 0.7375(7) 0.1311(9) 0.044(2) Uiso 0.50 1 d P . -1
H16 H -0.0741 0.7012 0.0559 0.053 Uiso 0.50 1 calc PR . -1
C17 C 0.0091(8) 0.9992(5) 0.2052(6) 0.0359(15) Uiso 0.50 1 d P . -1
H17A H -0.0687 1.0188 0.1311 0.043 Uiso 0.50 1 calc PR . -1
H17B H 0.1003 1.0163 0.1880 0.043 Uiso 0.50 1 calc PR . -1
C18 C -0.0042(8) 1.0570(5) 0.3210(7) 0.0419(17) Uiso 0.50 1 d P . -1
H18A H -0.0944 1.0401 0.3403 0.050 Uiso 0.50 1 calc PR . -1
H18B H 0.0756 1.0405 0.3952 0.050 Uiso 0.50 1 calc PR . -1
C19 C -0.0020(8) 1.1641(5) 0.2953(5) 0.0362(15) Uiso 0.50 1 d P . -1
C20 C -0.1257(8) 1.2152(5) 0.2375(7) 0.0390(16) Uiso 0.50 1 d P . -1
H20 H -0.2132 1.1827 0.2049 0.047 Uiso 0.50 1 calc PR . -1
C21 C -0.1205(8) 1.3147(5) 0.2275(7) 0.0330(17) Uiso 0.50 1 d P . -1
H21 H -0.2072 1.3478 0.1936 0.040 Uiso 0.50 1 calc PR . -1
N22 N 0.0009(12) 1.3655(3) 0.2634(9) 0.0276(12) Uiso 0.50 1 d P . -1
C23 C 0.1209(9) 1.3144(5) 0.3189(7) 0.0341(18) Uiso 0.50 1 d P . -1
H23 H 0.2077 1.3483 0.3489 0.041 Uiso 0.50 1 calc PR . -1
C24 C 0.1246(8) 1.2165(5) 0.3343(7) 0.0405(16) Uiso 0.50 1 d P . -1
H24 H 0.2123 1.1852 0.3709 0.049 Uiso 0.50 1 calc PR . -1
 
loop_
 _atom_site_aniso_label
 _atom_site_aniso_U_11
 _atom_site_aniso_U_22
 _atom_site_aniso_U_33
 _atom_site_aniso_U_23
 _atom_site_aniso_U_13
 _atom_site_aniso_U_12
Fe1 0.0432(4) 0.0199(3) 0.0295(4) 0.000 0.0097(3) 0.000
C1 0.0324(17) 0.0223(13) 0.0290(16) -0.0016(11) 0.0062(14) 0.0020(12)
O1 0.0311(12) 0.0409(13) 0.0265(11) 0.0025(10) 0.0033(10) 0.0046(10)
O2 0.0335(12) 0.0359(12) 0.0303(12) 0.0009(10) 0.0095(10) -0.0034(10)
 
_geom_special_details
;
 All esds (except the esd in the dihedral angle between two l.s. planes)
 are estimated using the full covariance matrix.  The cell esds are taken
 into account individually in the estimation of esds in distances, angles
 and torsion angles; correlations between esds in cell parameters are only
 used when they are defined by crystal symmetry.  An approximate (isotropic)
 treatment of cell esds is used for estimating esds involving l.s. planes.
;
 
loop_
 _geom_bond_atom_site_label_1
 _geom_bond_atom_site_label_2
 _geom_bond_distance
 _geom_bond_site_symmetry_2
 _geom_bond_publ_flag
Fe1 O1 2.102(2) 2 ?
Fe1 O1 2.102(2) . ?
Fe1 O2 2.126(2) 2 ?
Fe1 O2 2.126(2) . ?
Fe1 N11 2.212(4) 2 ?
Fe1 N11 2.212(4) . ?
Fe1 N22 2.239(4) 2_545 ?
Fe1 N22 2.239(4) 1_545 ?
C1 O1 1.242(4) . ?
C1 O2 1.246(4) 5_566 ?
C1 C1 1.576(6) 5_566 ?
O2 C1 1.246(4) 5_566 ?
N11 C16 1.306(13) . ?
N11 C12 1.362(14) . ?
C12 C13 1.407(12) . ?
C12 H12 0.9300 . ?
C13 C14 1.402(10) . ?
C13 H13 0.9300 . ?
C14 C15 1.335(10) . ?
C14 C17 1.505(8) . ?
C15 C16 1.343(12) . ?
C15 H15 0.9300 . ?
C16 H16 0.9300 . ?
C17 C18 1.519(8) . ?
C17 H17A 0.9700 . ?
C17 H17B 0.9700 . ?
C18 C19 1.504(9) . ?
C18 H18A 0.9700 . ?
C18 H18B 0.9700 . ?
C19 C20 1.371(9) . ?
C19 C24 1.373(10) . ?
C20 C21 1.376(10) . ?
C20 H20 0.9300 . ?
C21 N22 1.319(12) . ?
C21 H21 0.9300 . ?
N22 C23 1.340(12) . ?
N22 Fe1 2.239(4) 1_565 ?
C23 C24 1.358(10) . ?
C23 H23 0.9300 . ?
C24 H24 0.9300 . ?
 
loop_
 _geom_angle_atom_site_label_1
 _geom_angle_atom_site_label_2
 _geom_angle_atom_site_label_3
 _geom_angle
 _geom_angle_site_symmetry_1
 _geom_angle_site_symmetry_3
 _geom_angle_publ_flag
O1 Fe1 O1 174.87(12) 2 . ?
O1 Fe1 O2 78.99(8) 2 2 ?
O1 Fe1 O2 100.75(8) . 2 ?
O1 Fe1 O2 100.75(8) 2 . ?
O1 Fe1 O2 78.99(8) . . ?
O2 Fe1 O2 174.28(12) 2 . ?
O1 Fe1 N11 95.1(3) 2 2 ?
O1 Fe1 N11 90.0(3) . 2 ?
O2 Fe1 N11 95.6(3) 2 2 ?
O2 Fe1 N11 90.1(3) . 2 ?
O1 Fe1 N11 90.0(3) 2 . ?
O1 Fe1 N11 95.1(3) . . ?
O2 Fe1 N11 90.1(3) 2 . ?
O2 Fe1 N11 95.6(3) . . ?
N11 Fe1 N11 6.8(5) 2 . ?
O1 Fe1 N22 84.8(3) 2 2_545 ?
O1 Fe1 N22 90.1(3) . 2_545 ?
O2 Fe1 N22 84.2(3) 2 2_545 ?
O2 Fe1 N22 90.1(3) . 2_545 ?
N11 Fe1 N22 179.8(4) 2 2_545 ?
N11 Fe1 N22 172.9(3) . 2_545 ?
O1 Fe1 N22 90.1(3) 2 1_545 ?
O1 Fe1 N22 84.8(3) . 1_545 ?
O2 Fe1 N22 90.1(3) 2 1_545 ?
O2 Fe1 N22 84.2(3) . 1_545 ?
N11 Fe1 N22 172.9(3) 2 1_545 ?
N11 Fe1 N22 179.8(4) . 1_545 ?
N22 Fe1 N22 7.3(4) 2_545 1_545 ?
O1 C1 O2 126.8(3) . 5_566 ?
O1 C1 C1 116.6(3) . 5_566 ?
O2 C1 C1 116.5(3) 5_566 5_566 ?
C1 O1 Fe1 113.55(19) . . ?
C1 O2 Fe1 112.7(2) 5_566 . ?
C16 N11 C12 115.0(5) . . ?
C16 N11 Fe1 124.7(7) . . ?
C12 N11 Fe1 119.2(7) . . ?
N11 C12 C13 118.7(8) . . ?
N11 C12 H12 120.6 . . ?
C13 C12 H12 120.6 . . ?
C14 C13 C12 121.7(8) . . ?
C14 C13 H13 119.1 . . ?
C12 C13 H13 119.1 . . ?
C15 C14 C13 116.1(6) . . ?
C15 C14 C17 121.1(6) . . ?
C13 C14 C17 122.6(6) . . ?
C14 C15 C16 119.0(8) . . ?
C14 C15 H15 120.5 . . ?
C16 C15 H15 120.5 . . ?
N11 C16 C15 128.1(9) . . ?
N11 C16 H16 116.0 . . ?
C15 C16 H16 116.0 . . ?
C14 C17 C18 115.4(5) . . ?
C14 C17 H17A 108.4 . . ?
C18 C17 H17A 108.4 . . ?
C14 C17 H17B 108.4 . . ?
C18 C17 H17B 108.4 . . ?
H17A C17 H17B 107.5 . . ?
C19 C18 C17 110.7(5) . . ?
C19 C18 H18A 109.5 . . ?
C17 C18 H18A 109.5 . . ?
C19 C18 H18B 109.5 . . ?
C17 C18 H18B 109.5 . . ?
H18A C18 H18B 108.1 . . ?
C20 C19 C24 116.6(6) . . ?
C20 C19 C18 122.3(6) . . ?
C24 C19 C18 121.0(6) . . ?
C19 C20 C21 120.1(7) . . ?
C19 C20 H20 119.9 . . ?
C21 C20 H20 119.9 . . ?
N22 C21 C20 123.6(7) . . ?
N22 C21 H21 118.2 . . ?
C20 C21 H21 118.2 . . ?
C21 N22 C23 115.5(4) . . ?
C21 N22 Fe1 121.6(6) . 1_565 ?
C23 N22 Fe1 122.7(6) . 1_565 ?
N22 C23 C24 124.5(7) . . ?
N22 C23 H23 117.8 . . ?
C24 C23 H23 117.8 . . ?
C23 C24 C19 119.6(7) . . ?
C23 C24 H24 120.2 . . ?
C19 C24 H24 120.2 . . ?
 
loop_
 _geom_hbond_atom_site_label_D
 _geom_hbond_atom_site_label_H
 _geom_hbond_atom_site_label_A
 _geom_hbond_distance_DH
 _geom_hbond_distance_HA
 _geom_hbond_distance_DA
 _geom_hbond_angle_DHA
 _geom_hbond_site_symmetry_A
C13 H13 O2  0.93 2.83 3.662(8) 149.4 7_566
C15 H15 O2  0.93 2.90 3.607(8) 133.5 8_465
C20 H20 O1  0.93 2.61 3.445(7) 149.7 4_455
C24 H24 O1  0.93 2.65 3.440(8) 142.6 3
 
_diffrn_measured_fraction_theta_max    0.996
_diffrn_reflns_theta_full              30.08
_diffrn_measured_fraction_theta_full   0.996
_refine_diff_density_max    0.616
_refine_diff_density_min   -0.515
_refine_diff_density_rms    0.099

#===END

data_compound5
 
_audit_creation_method            SHELXL97
_publ_contact_author            
;
 Oscar Castillo. Departamento de Quimica Inorganica.
 Facultad de Ciencia y Tecnologia
 Universidad del Pais Vasco,  Apdo. 644, E-48080 Bilbao, Spain
;
_publ_contact_author_email       'oscar.castillo@ehu.es'
_publ_contact_author_fax         '+34-946 013 500'
_publ_contact_author_phone       '+34-946 015 991'

_publ_requested_journal          'Crystal Growth & Design'
_publ_section_title
;
Rational Desing of 2-D Magnetic Metal-Organic Coordination Polymers
Assembled from Oxalato and Dipyridyl Spacers.
;
loop_
_publ_author_name               
_publ_author_address            
'Urko Garcia-Couceiro'
;
 Departamento de Quimica Inorganica. Facultad de Ciencia y Tecnologia
 Universidad del Pais Vasco,  Apdo. 644, E-48080 Bilbao, Spain
;
'Oscar Castillo'
;
 Departamento de Quimica Inorganica. Facultad de Ciencia y Tecnologia
 Universidad del Pais Vasco,  Apdo. 644, E-48080 Bilbao, Spain
;
'Antonio Luque'
;
 Departamento de Quimica Inorganica. Facultad de Ciencia y Tecnologia
 Universidad del Pais Vasco,  Apdo. 644, E-48080 Bilbao, Spain
;
'Juan P. Garcia-Teran'
;
 Departamento de Quimica Inorganica. Facultad de Ciencia y Tecnologia
 Universidad del Pais Vasco,  Apdo. 644, E-48080 Bilbao, Spain
;
'Garikoitz Beobide'
;
 Departamento de Quimica Inorganica. Facultad de Ciencia y Tecnologia
 Universidad del Pais Vasco,  Apdo. 644, E-48080 Bilbao, Spain
;
'Pascual Roman'
;
 Departamento de Quimica Inorganica. Facultad de Ciencia y Tecnologia
 Universidad del Pais Vasco,  Apdo. 644, E-48080 Bilbao, Spain
;

_chemical_name_systematic
;
catena-[(mu-oxalato)(mu-1,2-bis(4-pyridyl)ethane)Copper(II)]
;
_chemical_formula_moiety                 'C14 H12 Cu N2 O4'
_chemical_formula_structural             'C14 H12 Cu N2 O4'
_chemical_formula_sum                    'C14 H12 Cu N2 O4'
_chemical_formula_weight                335.80
_chemical_compound_source               'synthesis as described'

 
loop_
 _atom_type_symbol
 _atom_type_description
 _atom_type_scat_dispersion_real
 _atom_type_scat_dispersion_imag
 _atom_type_scat_source
 'C'  'C'   0.0033   0.0016
 'International Tables Vol C Tables 4.2.6.8 and 6.1.1.4'
 'H'  'H'   0.0000   0.0000
 'International Tables Vol C Tables 4.2.6.8 and 6.1.1.4'
 'N'  'N'   0.0061   0.0033
 'International Tables Vol C Tables 4.2.6.8 and 6.1.1.4'
 'O'  'O'   0.0106   0.0060
 'International Tables Vol C Tables 4.2.6.8 and 6.1.1.4'
 'Cu'  'Cu'   0.3201   1.2651
 'International Tables Vol C Tables 4.2.6.8 and 6.1.1.4'

_symmetry_cell_setting                  Monoclinic
_symmetry_space_group_name_H-M          'C 2/c'
_symmetry_space_group_name_Hall         '-C 2yc'
_symmetry_Int_Tables_number             15
 
loop_
 _symmetry_equiv_pos_as_xyz
 'x, y, z'
 '-x, y, -z+1/2'
 'x+1/2, y+1/2, z'
 '-x+1/2, y+1/2, -z+1/2'
 '-x, -y, -z'
 'x, -y, z-1/2'
 '-x+1/2, -y+1/2, -z'
 'x+1/2, -y+1/2, z-1/2'
 
_cell_length_a                    9.517(3)
_cell_length_b                    13.406(3)
_cell_length_c                    10.877(3)
_cell_angle_alpha                 90.00
_cell_angle_beta                  106.20(3)
_cell_angle_gamma                 90.00
_cell_volume                      1332.6(7)
_cell_formula_units_Z             4
_cell_measurement_temperature     293(2)
_cell_measurement_reflns_used     5550
_cell_measurement_theta_min       2.70
_cell_measurement_theta_max       30.05
 
_exptl_crystal_description        prismatic
_exptl_crystal_colour             Blue
_exptl_crystal_size_max           0.13
_exptl_crystal_size_mid           0.06
_exptl_crystal_size_min           0.04
_exptl_crystal_density_meas       1.67(1)
_exptl_crystal_density_diffrn     1.674
_exptl_crystal_density_method     'flotation method'
_exptl_crystal_F_000              684
_exptl_absorpt_coefficient_mu     1.656
_exptl_absorpt_correction_type       numerical
_exptl_absorpt_process_details       
'CrysAlis RED (Oxford Diffraction, 2003)'
_exptl_absorpt_correction_T_min      0.81617
_exptl_absorpt_correction_T_max      0.93085
 
_diffrn_ambient_temperature       293(2)
_diffrn_radiation_wavelength      0.71073
_diffrn_radiation_type            MoK\a
_diffrn_radiation_source          'fine-focus sealed tube'
_diffrn_radiation_monochromator   graphite
_diffrn_measurement_device_type   'Xcalibur'
_diffrn_measurement_method        \w 
_diffrn_standards_number           0
_diffrn_standards_interval_count   0
_diffrn_standards_interval_time    0
_diffrn_standards_decay_%          0 
_diffrn_reflns_number             5550
_diffrn_reflns_av_R_equivalents   0.0473
_diffrn_reflns_av_sigmaI/netI     0.1275
_diffrn_reflns_limit_h_min        -13
_diffrn_reflns_limit_h_max        13
_diffrn_reflns_limit_k_min        -15
_diffrn_reflns_limit_k_max        18
_diffrn_reflns_limit_l_min        -14
_diffrn_reflns_limit_l_max        15
_diffrn_reflns_theta_min          2.70
_diffrn_reflns_theta_max          30.05
_reflns_number_total              1864
_reflns_number_gt                 1044
_reflns_threshold_expression      >2sigma(I)
 
_computing_data_collection              
'CrysAlis CCD (Oxford Diffraction, 2003)'
_computing_cell_refinement              
'CrysAlis CCD (Oxford Diffraction, 2003)'
_computing_data_reduction               
'CrysAlis RED (Oxford Diffraction, 2003)'
_computing_structure_solution           'Sir92 (Altamore et al., 1993)'
_computing_structure_refinement         'SHELXL-97 (Sheldrick, 1997)'
_computing_molecular_graphics           'Ortep-3 (Farrugia, 1997)'
_computing_publication_material         'WinGX (Farrugia, 1999)'
 
_refine_special_details
;
 Refinement of F^2^ against ALL reflections.  The weighted R-factor wR and
 goodness of fit S are based on F^2^, conventional R-factors R are based
 on F, with F set to zero for negative F^2^. The threshold expression of
 F^2^ > 2sigma(F^2^) is used only for calculating R-factors(gt) etc. and is
 not relevant to the choice of reflections for refinement.  R-factors based
 on F^2^ are statistically about twice as large as those based on F, and R-
 factors based on ALL data will be even larger.
;
 
_refine_ls_structure_factor_coef  Fsqd
_refine_ls_matrix_type            full
_refine_ls_weighting_scheme       calc
_refine_ls_weighting_details
 'calc w=1/[\s^2^(Fo^2^)+(0.0606P)^2^]'
_atom_sites_solution_primary      direct
_atom_sites_solution_secondary    difmap
_atom_sites_solution_hydrogens    geom
_refine_ls_hydrogen_treatment     constr
_refine_ls_extinction_method      none
_refine_ls_extinction_coef        ?
_refine_ls_number_reflns          1864
_refine_ls_number_parameters      89
_refine_ls_number_restraints      0
_refine_ls_R_factor_all           0.0856
_refine_ls_R_factor_gt            0.0437
_refine_ls_wR_factor_ref          0.1253
_refine_ls_wR_factor_gt           0.1187
_refine_ls_goodness_of_fit_ref    0.842
_refine_ls_restrained_S_all       0.842
_refine_ls_shift/su_max           0.002
_refine_ls_shift/su_mean          0.000
 
loop_
 _atom_site_label
 _atom_site_type_symbol
 _atom_site_fract_x
 _atom_site_fract_y
 _atom_site_fract_z
 _atom_site_U_iso_or_equiv
 _atom_site_adp_type
 _atom_site_occupancy
 _atom_site_symmetry_multiplicity
 _atom_site_calc_flag
 _atom_site_refinement_flags
 _atom_site_disorder_assembly
 _atom_site_disorder_group
Cu1 Cu 0.0000 0.52967(5) 0.2500 0.0226(2) Uani 1 2 d S . .
C1 C -0.0858(4) 0.5024(3) 0.4733(4) 0.0228(9) Uani 1 1 d . . .
O1 O -0.1361(3) 0.52775(19) 0.3577(2) 0.0257(6) Uani 1 1 d . . .
O2 O 0.1599(3) 0.5182(2) 0.4533(2) 0.0290(6) Uani 1 1 d . . .
N11 N -0.0025(18) 0.6817(3) 0.2611(14) 0.0256(16) Uiso 0.50 1 d P . -1
C12 C 0.0470(13) 0.7329(9) 0.3678(12) 0.034(3) Uiso 0.50 1 d P . -1
H12 H 0.0825 0.6954 0.4419 0.040 Uiso 0.50 1 calc PR . -1
C13 C 0.0528(11) 0.8317(7) 0.3830(10) 0.037(2) Uiso 0.50 1 d P . -1
H13 H 0.0942 0.8597 0.4632 0.044 Uiso 0.50 1 calc PR . -1
C14 C -0.0018(10) 0.8895(5) 0.2810(7) 0.0225(18) Uiso 0.50 1 d P . -1
C17 C -0.0080(10) 1.0010(6) 0.2949(7) 0.032(2) Uiso 0.50 1 d P . -1
H17A H 0.0708 1.0211 0.3686 0.039 Uiso 0.50 1 calc PR . -1
H17B H -0.0995 1.0181 0.3126 0.039 Uiso 0.50 1 calc PR . -1
C16 C -0.0675(14) 0.7365(10) 0.1583(12) 0.041(4) Uiso 0.50 1 d P . -1
H16 H -0.1155 0.7049 0.0820 0.049 Uiso 0.50 1 calc PR . -1
C15 C -0.0644(11) 0.8415(8) 0.1639(10) 0.039(3) Uiso 0.50 1 d P . -1
H15 H -0.1036 0.8789 0.0902 0.047 Uiso 0.50 1 calc PR . -1
N22 N -0.003(3) 1.3767(3) 0.2417(19) 0.0233(15) Uiso 0.50 1 d P . -1
C21 C -0.1250(10) 1.3241(7) 0.1850(9) 0.026(2) Uiso 0.50 1 d P . -1
H21 H -0.2123 1.3589 0.1542 0.031 Uiso 0.50 1 calc PR . -1
C20 C -0.1276(9) 1.2235(6) 0.1706(8) 0.0305(19) Uiso 0.50 1 d P . -1
H20 H -0.2163 1.1906 0.1380 0.037 Uiso 0.50 1 calc PR . -1
C19 C 0.0020(9) 1.1698(6) 0.2045(7) 0.0287(19) Uiso 0.50 1 d P . -1
C18 C 0.0039(10) 1.0609(6) 0.1791(8) 0.034(2) Uiso 0.50 1 d P . -1
H18A H 0.0941 1.0437 0.1592 0.040 Uiso 0.50 1 calc PR . -1
H18B H -0.0771 1.0441 0.1056 0.040 Uiso 0.50 1 calc PR . -1
C23 C 0.1227(10) 1.3252(7) 0.2724(9) 0.025(2) Uiso 0.50 1 d P . -1
H23 H 0.2103 1.3597 0.3034 0.030 Uiso 0.50 1 calc PR . -1
C24 C 0.1272(9) 1.2235(6) 0.2602(9) 0.0294(19) Uiso 0.50 1 d P . -1
H24 H 0.2160 1.1903 0.2898 0.035 Uiso 0.50 1 calc PR . -1
 
loop_
 _atom_site_aniso_label
 _atom_site_aniso_U_11
 _atom_site_aniso_U_22
 _atom_site_aniso_U_33
 _atom_site_aniso_U_23
 _atom_site_aniso_U_13
 _atom_site_aniso_U_12
Cu1 0.0302(4) 0.0163(3) 0.0212(4) 0.000 0.0073(3) 0.000
C1 0.024(2) 0.0204(19) 0.023(2) -0.0035(14) 0.0048(17) 0.0013(15)
O1 0.0234(14) 0.0320(14) 0.0198(13) 0.0017(12) 0.0028(11) 0.0038(13)
O2 0.0240(15) 0.0397(16) 0.0242(14) 0.0012(12) 0.0080(12) -0.0029(13)
 
_geom_special_details
;
 All esds (except the esd in the dihedral angle between two l.s. planes)
 are estimated using the full covariance matrix.  The cell esds are taken
 into account individually in the estimation of esds in distances, angles
 and torsion angles; correlations between esds in cell parameters are only
 used when they are defined by crystal symmetry.  An approximate (isotropic)
 treatment of cell esds is used for estimating esds involving l.s. planes.
;
 
loop_
 _geom_bond_atom_site_label_1
 _geom_bond_atom_site_label_2
 _geom_bond_distance
 _geom_bond_site_symmetry_2
 _geom_bond_publ_flag
Cu1 O1 1.974(3) . ?
Cu1 O1 1.974(3) 2 ?
Cu1 N11 2.043(5) . ?
Cu1 N11 2.043(5) 2 ?
Cu1 N22 2.052(4) 1_545 ?
Cu1 N22 2.052(4) 2_545 ?
Cu1 O2 2.314(3) 2 ?
Cu1 O2 2.314(3) . ?
C1 O2 1.235(4) 5_566 ?
C1 O1 1.261(4) . ?
C1 C1 1.574(8) 5_566 ?
O2 C1 1.235(4) 5_566 ?
N11 C12 1.317(17) . ?
N11 C16 1.337(18) . ?
C12 C13 1.333(14) . ?
C12 H12 0.9300 . ?
C13 C14 1.334(12) . ?
C13 H13 0.9300 . ?
C14 C15 1.403(13) . ?
C14 C17 1.504(10) . ?
C17 C18 1.525(10) . ?
C17 H17A 0.9700 . ?
C17 H17B 0.9700 . ?
C16 C15 1.409(16) . ?
C16 H16 0.9300 . ?
C15 H15 0.9300 . ?
N22 C21 1.35(2) . ?
N22 C23 1.34(2) . ?
N22 Cu1 2.052(4) 1_565 ?
C21 C20 1.357(12) . ?
C21 H21 0.9300 . ?
C20 C19 1.386(11) . ?
C20 H20 0.9300 . ?
C19 C24 1.379(11) . ?
C19 C18 1.486(11) . ?
C18 H18A 0.9700 . ?
C18 H18B 0.9700 . ?
C23 C24 1.372(11) . ?
C23 H23 0.9300 . ?
C24 H24 0.9300 . ?
 
loop_
 _geom_angle_atom_site_label_1
 _geom_angle_atom_site_label_2
 _geom_angle_atom_site_label_3
 _geom_angle
 _geom_angle_site_symmetry_1
 _geom_angle_site_symmetry_3
 _geom_angle_publ_flag
O1 Cu1 O1 178.50(16) . 2 ?
O1 Cu1 N11 87.6(4) . . ?
O1 Cu1 N11 93.9(4) 2 . ?
O1 Cu1 N11 93.9(4) . 2 ?
O1 Cu1 N11 87.6(4) 2 2 ?
N11 Cu1 N11 7.3(8) . 2 ?
O1 Cu1 N22 90.6(6) . 1_545 ?
O1 Cu1 N22 87.9(6) 2 1_545 ?
N11 Cu1 N22 178.2(8) . 1_545 ?
N11 Cu1 N22 174.1(6) 2 1_545 ?
O1 Cu1 N22 87.9(6) . 2_545 ?
O1 Cu1 N22 90.6(6) 2 2_545 ?
N11 Cu1 N22 174.1(6) . 2_545 ?
N11 Cu1 N22 178.2(8) 2 2_545 ?
N22 Cu1 N22 4.8(11) 1_545 2_545 ?
O1 Cu1 O2 101.59(10) . 2 ?
O1 Cu1 O2 78.31(10) 2 2 ?
N11 Cu1 O2 96.2(4) . 2 ?
N11 Cu1 O2 91.4(4) 2 2 ?
N22 Cu1 O2 84.0(6) 1_545 2 ?
N22 Cu1 O2 88.4(6) 2_545 2 ?
O1 Cu1 O2 78.31(10) . . ?
O1 Cu1 O2 101.59(10) 2 . ?
N11 Cu1 O2 91.4(4) . . ?
N11 Cu1 O2 96.2(4) 2 . ?
N22 Cu1 O2 88.4(6) 1_545 . ?
N22 Cu1 O2 84.0(6) 2_545 . ?
O2 Cu1 O2 172.36(14) 2 . ?
O2 C1 O1 125.3(4) 5_566 . ?
O2 C1 C1 118.3(4) 5_566 5_566 ?
O1 C1 C1 116.4(4) . 5_566 ?
C1 O1 Cu1 117.8(2) . . ?
C1 O2 Cu1 106.9(2) 5_566 . ?
C12 N11 C16 114.8(6) . . ?
C12 N11 Cu1 124.4(9) . . ?
C16 N11 Cu1 120.6(9) . . ?
N11 C12 C13 128.3(11) . . ?
N11 C12 H12 115.9 . . ?
C13 C12 H12 115.9 . . ?
C12 C13 C14 118.7(10) . . ?
C12 C13 H13 120.6 . . ?
C14 C13 H13 120.6 . . ?
C13 C14 C15 117.2(7) . . ?
C13 C14 C17 120.7(7) . . ?
C15 C14 C17 121.9(7) . . ?
C14 C17 C18 115.2(6) . . ?
C14 C17 H17A 108.5 . . ?
C18 C17 H17A 108.5 . . ?
C14 C17 H17B 108.5 . . ?
C18 C17 H17B 108.5 . . ?
H17A C17 H17B 107.5 . . ?
N11 C16 C15 120.9(11) . . ?
N11 C16 H16 119.6 . . ?
C15 C16 H16 119.6 . . ?
C16 C15 C14 119.7(10) . . ?
C16 C15 H15 120.1 . . ?
C14 C15 H15 120.1 . . ?
C21 N22 C23 116.0(6) . . ?
C21 N22 Cu1 122.6(12) . 1_565 ?
C23 N22 Cu1 120.4(12) . 1_565 ?
N22 C21 C20 123.7(9) . . ?
N22 C21 H21 118.1 . . ?
C20 C21 H21 118.1 . . ?
C21 C20 C19 119.9(8) . . ?
C21 C20 H20 120.0 . . ?
C19 C20 H20 120.0 . . ?
C24 C19 C20 116.2(7) . . ?
C24 C19 C18 122.7(7) . . ?
C20 C19 C18 121.1(7) . . ?
C19 C18 C17 110.9(7) . . ?
C19 C18 H18A 109.5 . . ?
C17 C18 H18A 109.5 . . ?
C19 C18 H18B 109.5 . . ?
C17 C18 H18B 109.5 . . ?
H18A C18 H18B 108.1 . . ?
N22 C23 C24 122.6(9) . . ?
N22 C23 H23 118.7 . . ?
C24 C23 H23 118.7 . . ?
C23 C24 C19 121.0(8) . . ?
C23 C24 H24 119.5 . . ?
C19 C24 H24 119.5 . . ?
 
loop_
 _geom_hbond_atom_site_label_D
 _geom_hbond_atom_site_label_H
 _geom_hbond_atom_site_label_A
 _geom_hbond_distance_DH
 _geom_hbond_distance_HA
 _geom_hbond_distance_DA
 _geom_hbond_angle_DHA
 _geom_hbond_site_symmetry_A
C13 H13 O2  0.93 2.79 3.459(11) 130.1 7_566
C15 H15 O2  0.93 2.71 3.508(11) 145.0 8_465
C20 H20 O1  0.93 2.60 3.414(9) 145.8 4_455
C24 H24 O1  0.93 2.59 3.428(9) 150.7 3
 
_diffrn_measured_fraction_theta_max    0.955
_diffrn_reflns_theta_full              30.05
_diffrn_measured_fraction_theta_full   0.955
_refine_diff_density_max    0.957
_refine_diff_density_min   -0.667
_refine_diff_density_rms    0.246

#===END

data_compound6
 
_audit_creation_method            SHELXL97
_publ_contact_author            
;
 Oscar Castillo. Departamento de Quimica Inorganica. 
 Facultad de Ciencia y Tecnologia
 Universidad del Pais Vasco,  Apdo. 644, E-48080 Bilbao, Spain
;
_publ_contact_author_email       'oscar.castillo@ehu.es'
_publ_contact_author_fax         '+34-946 013 500'
_publ_contact_author_phone       '+34-946 015 991'

_publ_requested_journal          'Crystal Growth & Design'
_publ_section_title
;
Rational Desing of 2-D Magnetic Metal-Organic Coordination Polymers
Assembled from Oxalato and Dipyridyl Spacers.
;
loop_
_publ_author_name               
_publ_author_address            
'Urko Garcia-Couceiro'
;
 Departamento de Quimica Inorganica. Facultad de Ciencia y Tecnologia
 Universidad del Pais Vasco,  Apdo. 644, E-48080 Bilbao, Spain
;
'Oscar Castillo'
;
 Departamento de Quimica Inorganica. Facultad de Ciencia y Tecnologia
 Universidad del Pais Vasco,  Apdo. 644, E-48080 Bilbao, Spain
;
'Antonio Luque'
;
 Departamento de Quimica Inorganica. Facultad de Ciencia y Tecnologia
 Universidad del Pais Vasco,  Apdo. 644, E-48080 Bilbao, Spain
;
'Juan P. Garcia-Teran'
;
 Departamento de Quimica Inorganica. Facultad de Ciencia y Tecnologia
 Universidad del Pais Vasco,  Apdo. 644, E-48080 Bilbao, Spain
;
'Garikoitz Beobide'
;
 Departamento de Quimica Inorganica. Facultad de Ciencia y Tecnologia
 Universidad del Pais Vasco,  Apdo. 644, E-48080 Bilbao, Spain
;
'Pascual Roman'
;
 Departamento de Quimica Inorganica. Facultad de Ciencia y Tecnologia
 Universidad del Pais Vasco,  Apdo. 644, E-48080 Bilbao, Spain
;

_chemical_name_systematic
;
catena-[(mu-oxalato)(mu-1,2-bis(4-pyridyl)ethylene)Zinc(II)]
;
_chemical_formula_moiety                 'C14 H10 N2 O4 Zn'
_chemical_formula_structural             'C14 H10 N2 O4 Zn'
_chemical_formula_sum                    'C14 H10 N2 O4 Zn'
_chemical_formula_weight                335.63
_chemical_compound_source               'synthesis as described'

 
loop_
 _atom_type_symbol
 _atom_type_description
 _atom_type_scat_dispersion_real
 _atom_type_scat_dispersion_imag
 _atom_type_scat_source
 'C'  'C'   0.0033   0.0016
 'International Tables Vol C Tables 4.2.6.8 and 6.1.1.4'
 'H'  'H'   0.0000   0.0000
 'International Tables Vol C Tables 4.2.6.8 and 6.1.1.4'
 'N'  'N'   0.0061   0.0033
 'International Tables Vol C Tables 4.2.6.8 and 6.1.1.4'
 'O'  'O'   0.0106   0.0060
 'International Tables Vol C Tables 4.2.6.8 and 6.1.1.4'
 'Zn'  'Zn'   0.2839   1.4301
 'International Tables Vol C Tables 4.2.6.8 and 6.1.1.4'

_symmetry_cell_setting                  Orthorhombic
_symmetry_space_group_name_H-M          'Immm'
_symmetry_space_group_name_Hall         '-I 22'
_symmetry_Int_Tables_number             71
 
loop_
 _symmetry_equiv_pos_as_xyz
 'x, y, z'
 '-x, -y, z'
 'x, -y, -z'
 '-x, y, -z'
 'x+1/2, y+1/2, z+1/2'
 '-x+1/2, -y+1/2, z+1/2'
 'x+1/2, -y+1/2, -z+1/2'
 '-x+1/2, y+1/2, -z+1/2'
 '-x, -y, -z'
 'x, y, -z'
 '-x, y, z'
 'x, -y, z'
 '-x+1/2, -y+1/2, -z+1/2'
 'x+1/2, y+1/2, -z+1/2'
 '-x+1/2, y+1/2, z+1/2'
 'x+1/2, -y+1/2, z+1/2'
 
_cell_length_a                    5.377(2)
_cell_length_b                    10.198(4)
_cell_length_c                    13.688(5)
_cell_angle_alpha                 90.00
_cell_angle_beta                  90.00
_cell_angle_gamma                 90.00
_cell_volume                      750.6(5)
_cell_formula_units_Z             2
_cell_measurement_temperature     293(2)
_cell_measurement_reflns_used     2845
_cell_measurement_theta_min       4.00
_cell_measurement_theta_max       28.17
 
_exptl_crystal_description        prismatic
_exptl_crystal_colour             Colourless
_exptl_crystal_size_max           0.100
_exptl_crystal_size_mid           0.035
_exptl_crystal_size_min           0.035
_exptl_crystal_density_meas       1.49(1)
_exptl_crystal_density_diffrn     1.485
_exptl_crystal_density_method     'flotation method'
_exptl_crystal_F_000              340
_exptl_absorpt_coefficient_mu     1.651
_exptl_absorpt_correction_type       numerical
_exptl_absorpt_process_details       
'CrysAlis RED (Oxford Diffraction, 2003)'
_exptl_absorpt_correction_T_min      0.88693
_exptl_absorpt_correction_T_max      0.95170
 
_diffrn_ambient_temperature       293(2)
_diffrn_radiation_wavelength      0.71073
_diffrn_radiation_type            MoK\a
_diffrn_radiation_source          'fine-focus sealed tube'
_diffrn_radiation_monochromator   graphite
_diffrn_measurement_device_type   'Xcalibur'
_diffrn_measurement_method        \w 
_diffrn_standards_number           0
_diffrn_standards_interval_count   0
_diffrn_standards_interval_time    0
_diffrn_standards_decay_%          0 
_diffrn_reflns_number             2845
_diffrn_reflns_av_R_equivalents   0.0525
_diffrn_reflns_av_sigmaI/netI     0.2246
_diffrn_reflns_limit_h_min        -7
_diffrn_reflns_limit_h_max        7
_diffrn_reflns_limit_k_min        -8
_diffrn_reflns_limit_k_max        13
_diffrn_reflns_limit_l_min        -18
_diffrn_reflns_limit_l_max        18
_diffrn_reflns_theta_min          4.00
_diffrn_reflns_theta_max          28.17
_reflns_number_total              553
_reflns_number_gt                 260
_reflns_threshold_expression      >2sigma(I)
 
_computing_data_collection              
'CrysAlis CCD (Oxford Diffraction, 2003)'
_computing_cell_refinement              
'CrysAlis CCD (Oxford Diffraction, 2003)'
_computing_data_reduction               
'CrysAlis RED (Oxford Diffraction, 2003)'
_computing_structure_solution           'Sir92 (Altamore et al., 1993)'
_computing_structure_refinement         'SHELXL-97 (Sheldrick, 1997)'
_computing_molecular_graphics           'Ortep-3 (Farrugia, 1997)'
_computing_publication_material         'WinGX (Farrugia, 1999)'
 
_refine_special_details
;
 Refinement of F^2^ against ALL reflections.  The weighted R-factor wR and
 goodness of fit S are based on F^2^, conventional R-factors R are based
 on F, with F set to zero for negative F^2^. The threshold expression of
 F^2^ > 2sigma(F^2^) is used only for calculating R-factors(gt) etc. and is
 not relevant to the choice of reflections for refinement.  R-factors based
 on F^2^ are statistically about twice as large as those based on F, and R-
 factors based on ALL data will be even larger.
;
 
_refine_ls_structure_factor_coef  Fsqd
_refine_ls_matrix_type            full
_refine_ls_weighting_scheme       calc
_refine_ls_weighting_details
 'calc w=1/[\s^2^(Fo^2^)+(0.0547P)^2^]'
_atom_sites_solution_primary      direct
_atom_sites_solution_secondary    difmap
_atom_sites_solution_hydrogens    geom
_refine_ls_hydrogen_treatment     constr
_refine_ls_extinction_method      none
_refine_ls_extinction_coef        ?
_refine_ls_number_reflns          553
_refine_ls_number_parameters      35
_refine_ls_number_restraints      6
_refine_ls_R_factor_all           0.1077
_refine_ls_R_factor_gt            0.0625
_refine_ls_wR_factor_ref          0.1269
_refine_ls_wR_factor_gt           0.1113
_refine_ls_goodness_of_fit_ref    0.778
_refine_ls_restrained_S_all       0.774
_refine_ls_shift/su_max           0.000
_refine_ls_shift/su_mean          0.000
 
loop_
 _atom_site_label
 _atom_site_type_symbol
 _atom_site_fract_x
 _atom_site_fract_y
 _atom_site_fract_z
 _atom_site_U_iso_or_equiv
 _atom_site_adp_type
 _atom_site_occupancy
 _atom_site_symmetry_multiplicity
 _atom_site_calc_flag
 _atom_site_refinement_flags
 _atom_site_disorder_assembly
 _atom_site_disorder_group
Zn Zn 0.0000 0.0000 0.5000 0.0297(7) Uani 1 8 d S . .
O1 O -0.2951(8) -0.1331(4) 0.5000 0.0346(13) Uani 1 2 d S A .
C1 C -0.5000 -0.0765(9) 0.5000 0.029(2) Uani 1 4 d S . .
N11 N 0.0000 -0.005(5) 0.6579(6) 0.044(3) Uiso 0.5 2 d SD A -1
C12 C 0.0000 0.107(6) 0.704(2) 0.08(3) Uiso 0.50 2 d SPD A -1
H12 H 0.0000 0.1806 0.6642 0.095 Uiso 0.50 2 calc SPR A -1
C13 C 0.0000 0.133(2) 0.8044(18) 0.077(10) Uiso 0.50 2 d SPD A -1
H13 H 0.0000 0.2181 0.8294 0.093 Uiso 0.50 2 calc SPR A -1
C14 C 0.0000 0.0254(15) 0.8621(10) 0.055(4) Uiso 0.50 2 d SPD A -1
C15 C 0.0000 -0.093(3) 0.8145(17) 0.072(9) Uiso 0.50 2 d SPD A -1
H15 H 0.0000 -0.1679 0.8528 0.087 Uiso 0.50 2 calc SPR A -1
C16 C 0.0000 -0.110(5) 0.7120(18) 0.06(3) Uiso 0.50 2 d SPD A -1
H16 H 0.0000 -0.1931 0.6842 0.071 Uiso 0.50 2 calc SPR A -1
C17 C 0.0000 0.0490(12) 0.9697(10) 0.069(6) Uiso 0.50 2 d SP A -1
H17 H 0.0000 0.1394 1.0000 0.082 Uiso 1 4 d S B -1
 
loop_
 _atom_site_aniso_label
 _atom_site_aniso_U_11
 _atom_site_aniso_U_22
 _atom_site_aniso_U_33
 _atom_site_aniso_U_23
 _atom_site_aniso_U_13
 _atom_site_aniso_U_12
Zn 0.0253(11) 0.0359(12) 0.0280(11) 0.000 0.000 0.000
O1 0.023(3) 0.030(3) 0.051(3) 0.000 0.000 0.008(2)
C1 0.033(7) 0.029(6) 0.026(6) 0.000 0.000 0.000
 
_geom_special_details
;
 All esds (except the esd in the dihedral angle between two l.s. planes)
 are estimated using the full covariance matrix.  The cell esds are taken
 into account individually in the estimation of esds in distances, angles
 and torsion angles; correlations between esds in cell parameters are only
 used when they are defined by crystal symmetry.  An approximate (isotropic)
 treatment of cell esds is used for estimating esds involving l.s. planes.
;
 
loop_
 _geom_bond_atom_site_label_1
 _geom_bond_atom_site_label_2
 _geom_bond_distance
 _geom_bond_site_symmetry_2
 _geom_bond_publ_flag
Zn O1 2.088(4) . ?
Zn O1 2.088(4) 11 ?
Zn O1 2.088(4) 9_556 ?
Zn O1 2.088(4) 3_556 ?
Zn N11 2.162(8) . ?
Zn N11 2.162(8) 9_556 ?
O1 C1 1.244(6) . ?
C1 O1 1.244(6) 11_455 ?
C1 C1 1.560(18) 9_456 ?
N11 C12 1.302(16) . ?
N11 C16 1.304(16) . ?
C12 C13 1.398(19) . ?
C12 H12 0.9300 . ?
C13 C14 1.354(19) . ?
C13 H13 0.9300 . ?
C14 C15 1.369(19) . ?
C14 C17 1.492(18) . ?
C15 C16 1.41(2) . ?
C15 H15 0.9300 . ?
C16 H16 0.9300 . ?
C17 H17 1.0114 . ?
 
loop_
 _geom_angle_atom_site_label_1
 _geom_angle_atom_site_label_2
 _geom_angle_atom_site_label_3
 _geom_angle
 _geom_angle_site_symmetry_1
 _geom_angle_site_symmetry_3
 _geom_angle_publ_flag
O1 Zn O1 98.9(2) . 11 ?
O1 Zn O1 180.0 . 9_556 ?
O1 Zn O1 81.1(2) 11 9_556 ?
O1 Zn O1 81.1(2) . 3_556 ?
O1 Zn O1 180.000(1) 11 3_556 ?
O1 Zn O1 98.9(2) 9_556 3_556 ?
O1 Zn N11 89.2(9) . . ?
O1 Zn N11 89.2(9) 11 . ?
O1 Zn N11 90.8(9) 9_556 . ?
O1 Zn N11 90.8(9) 3_556 . ?
O1 Zn N11 90.8(9) . 9_556 ?
O1 Zn N11 90.8(9) 11 9_556 ?
O1 Zn N11 89.2(9) 9_556 9_556 ?
O1 Zn N11 89.2(9) 3_556 9_556 ?
N11 Zn N11 180.000(2) . 9_556 ?
C1 O1 Zn 111.8(5) . . ?
O1 C1 O1 124.6(9) 11_455 . ?
O1 C1 C1 117.7(4) 11_455 9_456 ?
O1 C1 C1 117.7(4) . 9_456 ?
C12 N11 C16 116.3(14) . . ?
C12 N11 Zn 117.9(19) . . ?
C16 N11 Zn 125.9(19) . . ?
N11 C12 C13 130(4) . . ?
N11 C12 H12 114.9 . . ?
C13 C12 H12 114.9 . . ?
C14 C13 C12 115(3) . . ?
C14 C13 H13 122.7 . . ?
C12 C13 H13 122.7 . . ?
C13 C14 C15 115.9(14) . . ?
C13 C14 C17 116.4(16) . . ?
C15 C14 C17 127.7(15) . . ?
C14 C15 C16 126(3) . . ?
C14 C15 H15 117.2 . . ?
C16 C15 H15 117.2 . . ?
N11 C16 C15 117(3) . . ?
N11 C16 H16 121.3 . . ?
C15 C16 H16 121.3 . . ?
C14 C17 H17 123.5 . . ?
 
loop_
 _geom_hbond_atom_site_label_D
 _geom_hbond_atom_site_label_H
 _geom_hbond_atom_site_label_A
 _geom_hbond_distance_DH
 _geom_hbond_distance_HA
 _geom_hbond_distance_DA
 _geom_hbond_angle_DHA
 _geom_hbond_site_symmetry_A
C13 H13 O1  0.93 2.99 3.75(3) 139.3 8_456
C13 H13 O1  0.93 2.99 3.75(3) 139.3 5
C15 H15 O1  0.93 3.06 3.93(3) 156.6 6_445
C15 H15 O1  0.93 3.06 3.93(3) 156.6 7_546
C17 H17 O1  1.01 2.57 3.449(12) 145.4 8_456
C17 H17 O1  1.01 2.57 3.449(12) 145.4 5
 
_diffrn_measured_fraction_theta_max    0.991
_diffrn_reflns_theta_full              28.17
_diffrn_measured_fraction_theta_full   0.991
_refine_diff_density_max    0.565
_refine_diff_density_min   -0.510
_refine_diff_density_rms    0.108

#===END

data_compound8
 
_audit_creation_method            SHELXL97
_publ_contact_author            
;
 Oscar Castillo. Departamento de Quimica Inorganica.
 Facultad de Ciencia y Tecnologia
 Universidad del Pais Vasco,  Apdo. 644, E-48080 Bilbao, Spain
;
_publ_contact_author_email       'oscar.castillo@ehu.es'
_publ_contact_author_fax         '+34-946 013 500'
_publ_contact_author_phone       '+34-946 015 991'

_publ_requested_journal          'Crystal Growth & Design'
_publ_section_title
;
Rational Desing of 2-D Magnetic Metal-Organic Coordination Polymers
Assembled from Oxalato and Dipyridyl Spacers.
;
loop_
_publ_author_name               
_publ_author_address            
'Urko Garcia-Couceiro'
;
 Departamento de Quimica Inorganica. Facultad de Ciencia y Tecnologia
 Universidad del Pais Vasco,  Apdo. 644, E-48080 Bilbao, Spain
;
'Oscar Castillo'
;
 Departamento de Quimica Inorganica. Facultad de Ciencia y Tecnologia
 Universidad del Pais Vasco,  Apdo. 644, E-48080 Bilbao, Spain
;
'Antonio Luque'
;
 Departamento de Quimica Inorganica. Facultad de Ciencia y Tecnologia
 Universidad del Pais Vasco,  Apdo. 644, E-48080 Bilbao, Spain
;
'Juan P. Garcia-Teran'
;
 Departamento de Quimica Inorganica. Facultad de Ciencia y Tecnologia
 Universidad del Pais Vasco,  Apdo. 644, E-48080 Bilbao, Spain
;
'Garikoitz Beobide'
;
 Departamento de Quimica Inorganica. Facultad de Ciencia y Tecnologia
 Universidad del Pais Vasco,  Apdo. 644, E-48080 Bilbao, Spain
;
'Pascual Roman'
;
 Departamento de Quimica Inorganica. Facultad de Ciencia y Tecnologia
 Universidad del Pais Vasco,  Apdo. 644, E-48080 Bilbao, Spain
;

_chemical_name_systematic
;
catena-[(mu-oxalato)(mu-1,2-bis(4-pyridyl)ethylene)Cobalt(II)]
;
_chemical_formula_moiety                 'C14 H10 Co N2 O4'
_chemical_formula_structural             'C14 H10 Co N2 O4'
_chemical_formula_sum                    'C14 H10 Co N2 O4'
_chemical_formula_weight                329.17
_chemical_compound_source               'synthesis as described'

 
loop_
 _atom_type_symbol
 _atom_type_description
 _atom_type_scat_dispersion_real
 _atom_type_scat_dispersion_imag
 _atom_type_scat_source
 'C'  'C'   0.0033   0.0016
 'International Tables Vol C Tables 4.2.6.8 and 6.1.1.4'
 'H'  'H'   0.0000   0.0000
 'International Tables Vol C Tables 4.2.6.8 and 6.1.1.4'
 'N'  'N'   0.0061   0.0033
 'International Tables Vol C Tables 4.2.6.8 and 6.1.1.4'
 'O'  'O'   0.0106   0.0060
 'International Tables Vol C Tables 4.2.6.8 and 6.1.1.4'
 'Co'  'Co'   0.3494   0.9721
 'International Tables Vol C Tables 4.2.6.8 and 6.1.1.4'

_symmetry_cell_setting                  Orthorhombic
_symmetry_space_group_name_H-M          'Immm'
_symmetry_space_group_name_Hall         '-I 22'
_symmetry_Int_Tables_number             71
 
loop_
 _symmetry_equiv_pos_as_xyz
 'x, y, z'
 '-x, -y, z'
 'x, -y, -z'
 '-x, y, -z'
 'x+1/2, y+1/2, z+1/2'
 '-x+1/2, -y+1/2, z+1/2'
 'x+1/2, -y+1/2, -z+1/2'
 '-x+1/2, y+1/2, -z+1/2'
 '-x, -y, -z'
 'x, y, -z'
 '-x, y, z'
 'x, -y, z'
 '-x+1/2, -y+1/2, -z+1/2'
 'x+1/2, y+1/2, -z+1/2'
 '-x+1/2, y+1/2, z+1/2'
 'x+1/2, -y+1/2, z+1/2'
 
_cell_length_a                    5.4000(10)
_cell_length_b                    10.157(2)
_cell_length_c                    13.631(2)
_cell_angle_alpha                 90.00
_cell_angle_beta                  90.00
_cell_angle_gamma                 90.00
_cell_volume                      747.6(2)
_cell_formula_units_Z             2
_cell_measurement_temperature     293(2)
_cell_measurement_reflns_used     3385
_cell_measurement_theta_min       4.01
_cell_measurement_theta_max       30.06
 
_exptl_crystal_description        prismatic
_exptl_crystal_colour             orange
_exptl_crystal_size_max           0.40
_exptl_crystal_size_mid           0.12
_exptl_crystal_size_min           0.02
_exptl_crystal_density_meas       1.45(1)
_exptl_crystal_density_diffrn     1.462
_exptl_crystal_density_method     'flotation method'
_exptl_crystal_F_000              334
_exptl_absorpt_coefficient_mu     1.163
_exptl_absorpt_correction_type       numerical
_exptl_absorpt_process_details       
'CrysAlis RED (Oxford Diffraction, 2003)'
_exptl_absorpt_correction_T_min      0.72099
_exptl_absorpt_correction_T_max      0.97772
 
_diffrn_ambient_temperature       293(2)
_diffrn_radiation_wavelength      0.71073
_diffrn_radiation_type            MoK\a
_diffrn_radiation_source          'fine-focus sealed tube'
_diffrn_radiation_monochromator   graphite
_diffrn_measurement_device_type   'Xcalibur'
_diffrn_measurement_method        \w 
_diffrn_standards_number           0
_diffrn_standards_interval_count   0
_diffrn_standards_interval_time    0
_diffrn_standards_decay_%          0 
_diffrn_reflns_number             3385
_diffrn_reflns_av_R_equivalents   0.0503
_diffrn_reflns_av_sigmaI/netI     0.0438
_diffrn_reflns_limit_h_min        -6
_diffrn_reflns_limit_h_max        7
_diffrn_reflns_limit_k_min        -14
_diffrn_reflns_limit_k_max        14
_diffrn_reflns_limit_l_min        -18
_diffrn_reflns_limit_l_max        19
_diffrn_reflns_theta_min          4.01
_diffrn_reflns_theta_max          30.06
_reflns_number_total              661
_reflns_number_gt                 587
_reflns_threshold_expression      >2sigma(I)
 
_computing_data_collection              
'CrysAlis CCD (Oxford Diffraction, 2003)'
_computing_cell_refinement              
'CrysAlis CCD (Oxford Diffraction, 2003)'
_computing_data_reduction               
'CrysAlis RED (Oxford Diffraction, 2003)'
_computing_structure_solution           'Sir92 (Altamore et al., 1993)'
_computing_structure_refinement         'SHELXL-97 (Sheldrick, 1997)'
_computing_molecular_graphics           'Ortep-3 (Farrugia, 1997)'
_computing_publication_material         'WinGX (Farrugia, 1999)'
 
_refine_special_details
;
 Refinement of F^2^ against ALL reflections.  The weighted R-factor wR and
 goodness of fit S are based on F^2^, conventional R-factors R are based
 on F, with F set to zero for negative F^2^. The threshold expression of
 F^2^ > 2sigma(F^2^) is used only for calculating R-factors(gt) etc. and is
 not relevant to the choice of reflections for refinement.  R-factors based
 on F^2^ are statistically about twice as large as those based on F, and R-
 factors based on ALL data will be even larger.
;
 
_refine_ls_structure_factor_coef  Fsqd
_refine_ls_matrix_type            full
_refine_ls_weighting_scheme       calc
_refine_ls_weighting_details
 'calc w=1/[\s^2^(Fo^2^)+(0.1266P)^2^]'
_atom_sites_solution_primary      direct
_atom_sites_solution_secondary    difmap
_atom_sites_solution_hydrogens    geom
_refine_ls_hydrogen_treatment     constr
_refine_ls_extinction_method      none
_refine_ls_extinction_coef        ?
_refine_ls_number_reflns          1978
_refine_ls_number_parameters      89
_refine_ls_number_restraints      0
_refine_ls_R_factor_all           0.0639
_refine_ls_R_factor_gt            0.0600
_refine_ls_wR_factor_ref          0.1669
_refine_ls_wR_factor_gt           0.1628
_refine_ls_goodness_of_fit_ref    1.077
_refine_ls_restrained_S_all       1.077
_refine_ls_shift/su_max           0.001
_refine_ls_shift/su_mean          0.000
 
loop_
 _atom_site_label
 _atom_site_type_symbol
 _atom_site_fract_x
 _atom_site_fract_y
 _atom_site_fract_z
 _atom_site_U_iso_or_equiv
 _atom_site_adp_type
 _atom_site_occupancy
 _atom_site_symmetry_multiplicity
 _atom_site_calc_flag
 _atom_site_refinement_flags
 _atom_site_disorder_assembly
 _atom_site_disorder_group
Co1 Co 0.0000 0.0000 0.5000 0.0240(4) Uani 1 8 d S . .
O1 O -0.2947(4) -0.1327(2) 0.5000 0.0280(6) Uani 1 2 d S A .
C1 C -0.5000 -0.0773(4) 0.5000 0.0202(8) Uani 1 4 d S . .
N11 N 0.0000 0.0117(11) 0.6572(3) 0.0295(13) Uiso 0.50 2 d SP A -1
C12 C 0.0000 0.1209(16) 0.7047(12) 0.044(4) Uiso 0.50 2 d SP A -1
H12 H 0.0000 0.1965 0.6662 0.052 Uiso 0.50 2 calc SPR A -1
C13 C 0.0000 0.1416(13) 0.8015(8) 0.052(2) Uiso 0.50 2 d SP A -1
H13 H 0.0000 0.2261 0.8277 0.062 Uiso 0.50 2 calc SPR A -1
C14 C 0.0000 0.0306(6) 0.8610(5) 0.0363(17) Uiso 0.50 2 d SP A -1
C15 C 0.0000 -0.0919(12) 0.8151(7) 0.048(2) Uiso 0.50 2 d SP A -1
H15 H 0.0000 -0.1686 0.8524 0.057 Uiso 0.50 2 calc SPR A -1
C16 C 0.0000 -0.0990(17) 0.7106(14) 0.054(5) Uiso 0.50 2 d SP A -1
H16 H 0.0000 -0.1805 0.6795 0.065 Uiso 0.50 2 calc SPR A -1
C17 C 0.0000 0.0470(8) 0.9670(6) 0.0399(17) Uiso 0.50 2 d SP A -1
H17 H 0.0000 0.1394 1.0000 0.048 Uiso 1 4 d S B -1
 
loop_
 _atom_site_aniso_label
 _atom_site_aniso_U_11
 _atom_site_aniso_U_22
 _atom_site_aniso_U_33
 _atom_site_aniso_U_23
 _atom_site_aniso_U_13
 _atom_site_aniso_U_12
Co1 0.0191(5) 0.0285(5) 0.0244(5) 0.000 0.000 0.000
O1 0.0181(11) 0.0226(11) 0.0434(13) 0.000 0.000 0.0017(8)
C1 0.0186(19) 0.0199(18) 0.0220(17) 0.000 0.000 0.000
 
_geom_special_details
;
 All esds (except the esd in the dihedral angle between two l.s. planes)
 are estimated using the full covariance matrix.  The cell esds are taken
 into account individually in the estimation of esds in distances, angles
 and torsion angles; correlations between esds in cell parameters are only
 used when they are defined by crystal symmetry.  An approximate (isotropic)
 treatment of cell esds is used for estimating esds involving l.s. planes.
;
 
loop_
 _geom_bond_atom_site_label_1
 _geom_bond_atom_site_label_2
 _geom_bond_distance
 _geom_bond_site_symmetry_2
 _geom_bond_publ_flag
Co1 O1 2.085(2) 9_556 ?
Co1 O1 2.085(2) . ?
Co1 O1 2.085(2) 11 ?
Co1 O1 2.085(2) 3_556 ?
Co1 N11 2.146(4) 9_556 ?
Co1 N11 2.146(4) . ?
O1 C1 1.243(3) . ?
C1 O1 1.243(3) 11_455 ?
C1 C1 1.570(8) 9_456 ?
N11 C12 1.285(19) . ?
N11 C16 1.34(2) . ?
C12 C13 1.34(2) . ?
C12 H12 0.9300 . ?
C13 C14 1.389(14) . ?
C13 H13 0.9300 . ?
C14 C15 1.392(14) . ?
C14 C17 1.455(11) . ?
C15 C16 1.43(2) . ?
C15 H15 0.9300 . ?
C16 H16 0.9300 . ?
C17 H17 1.0404 . ?
 
loop_
 _geom_angle_atom_site_label_1
 _geom_angle_atom_site_label_2
 _geom_angle_atom_site_label_3
 _geom_angle
 _geom_angle_site_symmetry_1
 _geom_angle_site_symmetry_3
 _geom_angle_publ_flag
O1 Co1 O1 180.00(9) 9_556 . ?
O1 Co1 O1 80.52(12) 9_556 11 ?
O1 Co1 O1 99.48(12) . 11 ?
O1 Co1 O1 99.48(12) 9_556 3_556 ?
O1 Co1 O1 80.52(12) . 3_556 ?
O1 Co1 O1 180.0 11 3_556 ?
O1 Co1 N11 92.06(19) . . ?
O1 Co1 N11 92.06(19) 11 . ?
O1 Co1 N11 87.94(19) 9_556 . ?
O1 Co1 N11 87.94(19) 3_556 . ?
O1 Co1 N11 87.94(19) . 9_556 ?
O1 Co1 N11 92.06(19) 9_556 9_556 ?
O1 Co1 N11 87.94(19) 11 9_556 ?
O1 Co1 N11 92.06(19) 3_556 9_556 ?
N11 Co1 N11 180.000 9_556 . ?
C1 O1 Co1 112.8(2) . . ?
O1 C1 O1 126.2(4) 11_455 . ?
O1 C1 C1 116.90(18) 11_455 9_456 ?
O1 C1 C1 116.90(19) . 9_456 ?
C12 N11 C16 116.8(8) . . ?
C12 N11 Co1 123.5(10) . . ?
C16 N11 Co1 119.7(10) . . ?
N11 C12 C13 129.3(15) . . ?
N11 C12 H12 115.3 . . ?
C13 C12 H12 115.3 . . ?
C12 C13 C14 116.6(11) . . ?
C12 C13 H13 121.7 . . ?
C14 C13 H13 121.7 . . ?
C13 C14 C15 117.6(8) . . ?
C13 C14 C17 119.1(8) . . ?
C15 C14 C17 123.3(7) . . ?
C14 C15 C16 119.5(11) . . ?
C14 C15 H15 120.2 . . ?
C16 C15 H15 120.2 . . ?
N11 C16 C15 120.1(14) . . ?
N11 C16 H16 120.0 . . ?
C15 C16 H16 120.0 . . ?
C14 C17 H17 122.2 . . ?
 
loop_
 _geom_hbond_atom_site_label_D
 _geom_hbond_atom_site_label_H
 _geom_hbond_atom_site_label_A
 _geom_hbond_distance_DH
 _geom_hbond_distance_HA
 _geom_hbond_distance_DA
 _geom_hbond_angle_DHA
 _geom_hbond_site_symmetry_A
C13 H13 O1  0.93 2.96 3.716(11) 138.9 8_456
C13 H13 O1  0.93 2.96 3.716(11) 138.9 5
C15 H15 O1  0.93 3.06 3.929(10) 155.8 6_445
C15 H15 O1  0.93 3.06 3.929(10) 155.8 7_546
C17 H17 O1  1.04 2.57 3.466(8) 144.4 8_456
C17 H17 O1  1.04 2.57 3.466(8) 144.4 5
 
_diffrn_measured_fraction_theta_max    0.995
_diffrn_reflns_theta_full              30.06
_diffrn_measured_fraction_theta_full   0.995
_refine_diff_density_max    0.938
_refine_diff_density_min   -1.025
_refine_diff_density_rms    0.156

#===END

data_compound9
 
_audit_creation_method            SHELXL97
_publ_contact_author            
;
 Oscar Castillo. Departamento de Quimica Inorganica.
 Facultad de Ciencia y Tecnologia
 Universidad del Pais Vasco,  Apdo. 644, E-48080 Bilbao, Spain
;
_publ_contact_author_email       'oscar.castillo@ehu.es'
_publ_contact_author_fax         '+34-946 013 500'
_publ_contact_author_phone       '+34-946 015 991'

_publ_requested_journal          'Crystal Growth & Design'
_publ_section_title
;
Rational Desing of 2-D Magnetic Metal-Organic Coordination Polymers
Assembled from Oxalato and Dipyridyl Spacers.
;
loop_
_publ_author_name               
_publ_author_address            
'Urko Garcia-Couceiro'
;
 Departamento de Quimica Inorganica. Facultad de Ciencia y Tecnologia
 Universidad del Pais Vasco,  Apdo. 644, E-48080 Bilbao, Spain
;
'Oscar Castillo'
;
 Departamento de Quimica Inorganica. Facultad de Ciencia y Tecnologia
 Universidad del Pais Vasco,  Apdo. 644, E-48080 Bilbao, Spain
;
'Antonio Luque'
;
 Departamento de Quimica Inorganica. Facultad de Ciencia y Tecnologia
 Universidad del Pais Vasco,  Apdo. 644, E-48080 Bilbao, Spain
;
'Juan P. Garcia-Teran'
;
 Departamento de Quimica Inorganica. Facultad de Ciencia y Tecnologia
 Universidad del Pais Vasco,  Apdo. 644, E-48080 Bilbao, Spain
;
'Garikoitz Beobide'
;
 Departamento de Quimica Inorganica. Facultad de Ciencia y Tecnologia
 Universidad del Pais Vasco,  Apdo. 644, E-48080 Bilbao, Spain
;
'Pascual Roman'
;
 Departamento de Quimica Inorganica. Facultad de Ciencia y Tecnologia
 Universidad del Pais Vasco,  Apdo. 644, E-48080 Bilbao, Spain
;

_chemical_name_systematic
;
catena-[(mu-oxalato)(mu-1,2-bis(4-pyridyl)ethylene)Iron(II)]
;
_chemical_formula_moiety                 'C14 H10 Fe N2 O4'
_chemical_formula_structural             'C14 H10 Fe N2 O4'
_chemical_formula_sum                    'C14 H10 Fe N2 O4'
_chemical_formula_weight                326.09
_chemical_compound_source               'synthesis as described'

 
loop_
 _atom_type_symbol
 _atom_type_description
 _atom_type_scat_dispersion_real
 _atom_type_scat_dispersion_imag
 _atom_type_scat_source
 'C'  'C'   0.0033   0.0016
 'International Tables Vol C Tables 4.2.6.8 and 6.1.1.4'
 'H'  'H'   0.0000   0.0000
 'International Tables Vol C Tables 4.2.6.8 and 6.1.1.4'
 'N'  'N'   0.0061   0.0033
 'International Tables Vol C Tables 4.2.6.8 and 6.1.1.4'
 'O'  'O'   0.0106   0.0060
 'International Tables Vol C Tables 4.2.6.8 and 6.1.1.4'
 'Fe'  'Fe'   0.3463   0.8444
 'International Tables Vol C Tables 4.2.6.8 and 6.1.1.4'

_symmetry_cell_setting                  Orthorhombic
_symmetry_space_group_name_H-M          'Immm'
_symmetry_space_group_name_Hall         '-I 22'
_symmetry_Int_Tables_number             71
 
loop_
 _symmetry_equiv_pos_as_xyz
 'x, y, z'
 '-x, -y, z'
 'x, -y, -z'
 '-x, y, -z'
 'x+1/2, y+1/2, z+1/2'
 '-x+1/2, -y+1/2, z+1/2'
 'x+1/2, -y+1/2, -z+1/2'
 '-x+1/2, y+1/2, -z+1/2'
 '-x, -y, -z'
 'x, y, -z'
 '-x, y, z'
 'x, -y, z'
 '-x+1/2, -y+1/2, -z+1/2'
 'x+1/2, y+1/2, -z+1/2'
 '-x+1/2, y+1/2, z+1/2'
 'x+1/2, -y+1/2, z+1/2'
 
_cell_length_a                    5.4890(10)
_cell_length_b                    10.153(3)
_cell_length_c                    13.777(4)
_cell_angle_alpha                 90.00
_cell_angle_beta                  90.00
_cell_angle_gamma                 90.00
_cell_volume                      767.8(3)
_cell_formula_units_Z             2
_cell_measurement_temperature     293(2)
_cell_measurement_reflns_used     3439
_cell_measurement_theta_min       4.00
_cell_measurement_theta_max       30.05
 
_exptl_crystal_description        prismatic
_exptl_crystal_colour             red
_exptl_crystal_size_max           0.13
_exptl_crystal_size_mid           0.06
_exptl_crystal_size_min           0.06
_exptl_crystal_density_meas       1.42(1)
_exptl_crystal_density_diffrn     1.411
_exptl_crystal_density_method     'flotation method'
_exptl_crystal_F_000              332
_exptl_absorpt_coefficient_mu     0.997
_exptl_absorpt_correction_type       numerical
_exptl_absorpt_process_details       
'CrysAlis RED (Oxford Diffraction, 2003)'
_exptl_absorpt_correction_T_min      0.89053
_exptl_absorpt_correction_T_max      0.95195
 
_diffrn_ambient_temperature       293(2)
_diffrn_radiation_wavelength      0.71073
_diffrn_radiation_type            MoK\a
_diffrn_radiation_source          'fine-focus sealed tube'
_diffrn_radiation_monochromator   graphite
_diffrn_measurement_device_type   'Xcalibur'
_diffrn_measurement_method        \w 
_diffrn_standards_number           0
_diffrn_standards_interval_count   0
_diffrn_standards_interval_time    0
_diffrn_standards_decay_%          0 
_diffrn_reflns_number             3439
_diffrn_reflns_av_R_equivalents   0.0501
_diffrn_reflns_av_sigmaI/netI     0.0638
_diffrn_reflns_limit_h_min        -7
_diffrn_reflns_limit_h_max        6
_diffrn_reflns_limit_k_min        -13
_diffrn_reflns_limit_k_max        14
_diffrn_reflns_limit_l_min        -19
_diffrn_reflns_limit_l_max        19
_diffrn_reflns_theta_min          4.00
_diffrn_reflns_theta_max          30.05
_reflns_number_total              673
_reflns_number_gt                 454
_reflns_threshold_expression      >2sigma(I)
 
_computing_data_collection              
'CrysAlis CCD (Oxford Diffraction, 2003)'
_computing_cell_refinement              
'CrysAlis CCD (Oxford Diffraction, 2003)'
_computing_data_reduction               
'CrysAlis RED (Oxford Diffraction, 2003)'
_computing_structure_solution           'Sir92 (Altamore et al., 1993)'
_computing_structure_refinement         'SHELXL-97 (Sheldrick, 1997)'
_computing_molecular_graphics           'Ortep-3 (Farrugia, 1997)'
_computing_publication_material         'WinGX (Farrugia, 1999)'
 
_refine_special_details
;
 Refinement of F^2^ against ALL reflections.  The weighted R-factor wR and
 goodness of fit S are based on F^2^, conventional R-factors R are based
 on F, with F set to zero for negative F^2^. The threshold expression of
 F^2^ > 2sigma(F^2^) is used only for calculating R-factors(gt) etc. and is
 not relevant to the choice of reflections for refinement.  R-factors based
 on F^2^ are statistically about twice as large as those based on F, and R-
 factors based on ALL data will be even larger.
;
 
_refine_ls_structure_factor_coef  Fsqd
_refine_ls_matrix_type            full
_refine_ls_weighting_scheme       calc
_refine_ls_weighting_details
 'calc w=1/[\s^2^(Fo^2^)+(0.1022P)^2^]'
_atom_sites_solution_primary      direct
_atom_sites_solution_secondary    difmap
_atom_sites_solution_hydrogens    geom
_refine_ls_hydrogen_treatment     constr
_refine_ls_extinction_method      none
_refine_ls_extinction_coef        ?
_refine_ls_number_reflns          673
_refine_ls_number_parameters      35
_refine_ls_number_restraints      6
_refine_ls_R_factor_all           0.0827
_refine_ls_R_factor_gt            0.0604
_refine_ls_wR_factor_ref          0.1618
_refine_ls_wR_factor_gt           0.1531
_refine_ls_goodness_of_fit_ref    0.957
_refine_ls_restrained_S_all       0.956
_refine_ls_shift/su_max           0.002
_refine_ls_shift/su_mean          0.000
 
loop_
 _atom_site_label
 _atom_site_type_symbol
 _atom_site_fract_x
 _atom_site_fract_y
 _atom_site_fract_z
 _atom_site_U_iso_or_equiv
 _atom_site_adp_type
 _atom_site_occupancy
 _atom_site_symmetry_multiplicity
 _atom_site_calc_flag
 _atom_site_refinement_flags
 _atom_site_disorder_assembly
 _atom_site_disorder_group
Fe1 Fe 0.0000 0.0000 0.5000 0.0310(4) Uani 1 8 d S . .
O1 O -0.2975(5) -0.1325(2) 0.5000 0.0344(7) Uani 1 2 d S A .
C1 C -0.5000 -0.0769(5) 0.5000 0.0264(11) Uani 1 4 d S . .
N11 N 0.0000 0.0083(16) 0.6593(4) 0.0390(15) Uiso 0.50 2 d SPD A -1
C12 C 0.0000 0.1199(19) 0.7062(10) 0.056(6) Uiso 0.50 2 d SPD A -1
H12 H 0.0000 0.1956 0.6681 0.067 Uiso 0.50 2 calc SPR A -1
C13 C 0.0000 0.1392(16) 0.8040(10) 0.068(4) Uiso 0.50 2 d SPD A -1
H13 H 0.0000 0.2235 0.8304 0.082 Uiso 0.50 2 calc SPR A -1
C14 C 0.0000 0.0288(8) 0.8622(6) 0.048(2) Uiso 0.50 2 d SPD A -1
C15 C 0.0000 -0.0939(15) 0.8147(9) 0.062(4) Uiso 0.50 2 d SPD A -1
H15 H 0.0000 -0.1714 0.8506 0.075 Uiso 0.50 2 calc SPR A -1
C16 C 0.0000 -0.0987(19) 0.7140(11) 0.067(8) Uiso 0.50 2 d SPD A -1
H16 H 0.0000 -0.1806 0.6837 0.081 Uiso 0.50 2 calc SPR A -1
C17 C 0.0000 0.0483(9) 0.9676(7) 0.055(3) Uiso 0.50 2 d SP A -1
H17 H 0.0000 0.1394 1.0000 0.065 Uiso 1 4 d S B -1
 
loop_
 _atom_site_aniso_label
 _atom_site_aniso_U_11
 _atom_site_aniso_U_22
 _atom_site_aniso_U_33
 _atom_site_aniso_U_23
 _atom_site_aniso_U_13
 _atom_site_aniso_U_12
Fe1 0.0232(6) 0.0397(8) 0.0301(7) 0.000 0.000 0.000
O1 0.0218(14) 0.0299(16) 0.0516(18) 0.000 0.000 0.0028(11)
C1 0.024(3) 0.028(3) 0.028(3) 0.000 0.000 0.000
 
_geom_special_details
;
 All esds (except the esd in the dihedral angle between two l.s. planes)
 are estimated using the full covariance matrix.  The cell esds are taken
 into account individually in the estimation of esds in distances, angles
 and torsion angles; correlations between esds in cell parameters are only
 used when they are defined by crystal symmetry.  An approximate (isotropic)
 treatment of cell esds is used for estimating esds involving l.s. planes.
;
 
loop_
 _geom_bond_atom_site_label_1
 _geom_bond_atom_site_label_2
 _geom_bond_distance
 _geom_bond_site_symmetry_2
 _geom_bond_publ_flag
Fe1 O1 2.116(3) 9_556 ?
Fe1 O1 2.116(3) . ?
Fe1 O1 2.116(3) 3_556 ?
Fe1 O1 2.116(3) 11 ?
Fe1 N11 2.196(5) 9_556 ?
Fe1 N11 2.196(5) . ?
O1 C1 1.247(4) . ?
C1 O1 1.247(4) 11_455 ?
C1 C1 1.562(11) 9_456 ?
N11 C12 1.304(13) . ?
N11 C16 1.322(13) . ?
C12 C13 1.361(14) . ?
C12 H12 0.9300 . ?
C13 C14 1.379(15) . ?
C13 H13 0.9300 . ?
C14 C15 1.407(15) . ?
C14 C17 1.465(13) . ?
C15 C16 1.388(14) . ?
C15 H15 0.9300 . ?
C16 H16 0.9300 . ?
C17 H17 1.0273 . ?
 
loop_
 _geom_angle_atom_site_label_1
 _geom_angle_atom_site_label_2
 _geom_angle_atom_site_label_3
 _geom_angle
 _geom_angle_site_symmetry_1
 _geom_angle_site_symmetry_3
 _geom_angle_publ_flag
O1 Fe1 O1 180.00(14) 9_556 . ?
O1 Fe1 O1 78.98(14) 9_556 11 ?
O1 Fe1 O1 101.02(14) . 11 ?
O1 Fe1 O1 101.02(14) 9_556 3_556 ?
O1 Fe1 O1 78.98(14) . 3_556 ?
O1 Fe1 O1 180.0 3_556 11 ?
O1 Fe1 N11 91.4(3) . . ?
O1 Fe1 N11 91.4(3) 11 . ?
O1 Fe1 N11 88.6(3) 9_556 . ?
O1 Fe1 N11 88.6(3) 3_556 . ?
O1 Fe1 N11 88.6(3) . 9_556 ?
O1 Fe1 N11 91.4(3) 9_556 9_556 ?
O1 Fe1 N11 88.6(3) 11 9_556 ?
O1 Fe1 N11 91.4(3) 3_556 9_556 ?
N11 Fe1 N11 180.000(1) 9_556 . ?
C1 O1 Fe1 113.6(3) . . ?
O1 C1 O1 126.2(5) 11_455 . ?
O1 C1 C1 116.9(2) 11_455 9_456 ?
O1 C1 C1 116.9(2) . 9_456 ?
C12 N11 C16 115.6(10) . . ?
C12 N11 Fe1 121.9(10) . . ?
C16 N11 Fe1 122.5(11) . . ?
N11 C12 C13 128.0(16) . . ?
N11 C12 H12 116.0 . . ?
C13 C12 H12 116.0 . . ?
C12 C13 C14 117.4(14) . . ?
C12 C13 H13 121.3 . . ?
C14 C13 H13 121.3 . . ?
C13 C14 C15 116.6(9) . . ?
C13 C14 C17 117.9(9) . . ?
C15 C14 C17 125.5(9) . . ?
C16 C15 C14 119.8(14) . . ?
C16 C15 H15 120.1 . . ?
C14 C15 H15 120.1 . . ?
N11 C16 C15 122.7(16) . . ?
N11 C16 H16 118.7 . . ?
C15 C16 H16 118.7 . . ?
C14 C17 H17 123.5 . . ?
 
loop_
 _geom_hbond_atom_site_label_D
 _geom_hbond_atom_site_label_H
 _geom_hbond_atom_site_label_A
 _geom_hbond_distance_DH
 _geom_hbond_distance_HA
 _geom_hbond_distance_DA
 _geom_hbond_angle_DHA
 _geom_hbond_site_symmetry_A
C13 H13 O1  0.93 2.97 3.729(14) 139.5 8_456
C13 H13 O1  0.93 2.97 3.729(14) 139.5 5
C15 H15 O1  0.93 3.07 3.933(14) 154.8 6_445
C15 H15 O1  0.93 3.07 3.933(14) 154.8 7_546
C17 H17 O1  1.03 2.57 3.455(9) 144.3 8_456
C17 H17 O1  1.03 2.57 3.455(9) 144.3 5
 
_diffrn_measured_fraction_theta_max    0.996
_diffrn_reflns_theta_full              30.05
_diffrn_measured_fraction_theta_full   0.996
_refine_diff_density_max    0.747
_refine_diff_density_min   -0.603
_refine_diff_density_rms    0.114

#===END

data_compound10
 
_audit_creation_method            SHELXL97
_publ_contact_author            
;
 Oscar Castillo. Departamento de Quimica Inorganica.
 Facultad de Ciencia y Tecnologia
 Universidad del Pais Vasco,  Apdo. 644, E-48080 Bilbao, Spain
;
_publ_contact_author_email       'oscar.castillo@ehu.es'
_publ_contact_author_fax         '+34-946 013 500'
_publ_contact_author_phone       '+34-946 015 991'

_publ_requested_journal          'Crystal Growth & Design'
_publ_section_title
;
Rational Desing of 2-D Magnetic Metal-Organic Coordination Polymers
Assembled from Oxalato and Dipyridyl Spacers.
;
loop_
_publ_author_name               
_publ_author_address            
'Urko Garcia-Couceiro'
;
 Departamento de Quimica Inorganica. Facultad de Ciencia y Tecnologia
 Universidad del Pais Vasco,  Apdo. 644, E-48080 Bilbao, Spain
;
'Oscar Castillo'
;
 Departamento de Quimica Inorganica. Facultad de Ciencia y Tecnologia
 Universidad del Pais Vasco,  Apdo. 644, E-48080 Bilbao, Spain
;
'Antonio Luque'
;
 Departamento de Quimica Inorganica. Facultad de Ciencia y Tecnologia
 Universidad del Pais Vasco,  Apdo. 644, E-48080 Bilbao, Spain
;
'Juan P. Garcia-Teran'
;
 Departamento de Quimica Inorganica. Facultad de Ciencia y Tecnologia
 Universidad del Pais Vasco,  Apdo. 644, E-48080 Bilbao, Spain
;
'Garikoitz Beobide'
;
 Departamento de Quimica Inorganica. Facultad de Ciencia y Tecnologia
 Universidad del Pais Vasco,  Apdo. 644, E-48080 Bilbao, Spain
;
'Pascual Roman'
;
 Departamento de Quimica Inorganica. Facultad de Ciencia y Tecnologia
 Universidad del Pais Vasco,  Apdo. 644, E-48080 Bilbao, Spain
;

_chemical_name_systematic
;
catena-[(mu-oxalato)(mu-1,2-bis(4-pyridyl)ethylene)copper(II)]
;
_chemical_formula_moiety                 'C14 H10 Cu N2 O4'
_chemical_formula_structural             'C14 H10 Cu N2 O4'
_chemical_formula_sum                    'C14 H10 Cu N2 O4'
_chemical_formula_weight                333.78
_chemical_compound_source               'synthesis as described'

 
loop_
 _atom_type_symbol
 _atom_type_description
 _atom_type_scat_dispersion_real
 _atom_type_scat_dispersion_imag
 _atom_type_scat_source
 'C'  'C'   0.0033   0.0016
 'International Tables Vol C Tables 4.2.6.8 and 6.1.1.4'
 'H'  'H'   0.0000   0.0000
 'International Tables Vol C Tables 4.2.6.8 and 6.1.1.4'
 'N'  'N'   0.0061   0.0033
 'International Tables Vol C Tables 4.2.6.8 and 6.1.1.4'
 'O'  'O'   0.0106   0.0060
 'International Tables Vol C Tables 4.2.6.8 and 6.1.1.4'
 'Cu'  'Cu'   0.3201   1.2651
 'International Tables Vol C Tables 4.2.6.8 and 6.1.1.4'

_symmetry_cell_setting                  Orthorhombic
_symmetry_space_group_name_H-M          'Immm'
_symmetry_space_group_name_Hall         '-I 22'
_symmetry_Int_Tables_number             71
 
loop_
 _symmetry_equiv_pos_as_xyz
 'x, y, z'
 '-x, -y, z'
 'x, -y, -z'
 '-x, y, -z'
 'x+1/2, y+1/2, z+1/2'
 '-x+1/2, -y+1/2, z+1/2'
 'x+1/2, -y+1/2, -z+1/2'
 '-x+1/2, y+1/2, -z+1/2'
 '-x, -y, -z'
 'x, y, -z'
 '-x, y, z'
 'x, -y, z'
 '-x+1/2, -y+1/2, -z+1/2'
 'x+1/2, y+1/2, -z+1/2'
 '-x+1/2, y+1/2, z+1/2'
 'x+1/2, -y+1/2, z+1/2'
 
_cell_length_a                    5.510(2)
_cell_length_b                    10.242(3)
_cell_length_c                    13.436(4)
_cell_angle_alpha                 90.00
_cell_angle_beta                  90.00
_cell_angle_gamma                 90.00
_cell_volume                      758.2(4)
_cell_formula_units_Z             2
_cell_measurement_temperature     293(2)
_cell_measurement_reflns_used     2016
_cell_measurement_theta_min       3.98
_cell_measurement_theta_max       26.85
 
_exptl_crystal_description        prismatic
_exptl_crystal_colour             blue
_exptl_crystal_size_max           0.12
_exptl_crystal_size_mid           0.06
_exptl_crystal_size_min           0.05
_exptl_crystal_density_meas       1.46(1)
_exptl_crystal_density_diffrn     1.462
_exptl_crystal_density_method     'flotation method'
_exptl_crystal_F_000              338
_exptl_absorpt_coefficient_mu     1.455
_exptl_absorpt_correction_type       numerical
_exptl_absorpt_process_details       
'CrysAlis RED (Oxford Diffraction, 2003)'
_exptl_absorpt_correction_T_min      0.826
_exptl_absorpt_correction_T_max      0.945
 
_diffrn_ambient_temperature       293(2)
_diffrn_radiation_wavelength      0.71073
_diffrn_radiation_type            MoK\a
_diffrn_radiation_source          'fine-focus sealed tube'
_diffrn_radiation_monochromator   graphite
_diffrn_measurement_device_type   'Xcalibur'
_diffrn_measurement_method        \w 
_diffrn_standards_number           0
_diffrn_standards_interval_count   0
_diffrn_standards_interval_time    0
_diffrn_standards_decay_%          0 
_diffrn_reflns_number             2016
_diffrn_reflns_av_R_equivalents   0.0700
_diffrn_reflns_av_sigmaI/netI     0.1149
_diffrn_reflns_limit_h_min        -6
_diffrn_reflns_limit_h_max        6
_diffrn_reflns_limit_k_min        -11
_diffrn_reflns_limit_k_max        12
_diffrn_reflns_limit_l_min        -10
_diffrn_reflns_limit_l_max        16
_diffrn_reflns_theta_min          3.98
_diffrn_reflns_theta_max          26.85
_reflns_number_total              468
_reflns_number_gt                 258
_reflns_threshold_expression      >2sigma(I)
 
_computing_data_collection              
'CrysAlis CCD (Oxford Diffraction, 2003)'
_computing_cell_refinement              
'CrysAlis CCD (Oxford Diffraction, 2003)'
_computing_data_reduction               
'CrysAlis RED (Oxford Diffraction, 2003)'
_computing_structure_solution           'Sir92 (Altamore et al., 1993)'
_computing_structure_refinement         'SHELXL-97 (Sheldrick, 1997)'
_computing_molecular_graphics           'Ortep-3 (Farrugia, 1997)'
_computing_publication_material         'WinGX (Farrugia, 1999)'
 
_refine_special_details
;
 Refinement of F^2^ against ALL reflections.  The weighted R-factor wR and
 goodness of fit S are based on F^2^, conventional R-factors R are based
 on F, with F set to zero for negative F^2^. The threshold expression of
 F^2^ > 2sigma(F^2^) is used only for calculating R-factors(gt) etc. and is
 not relevant to the choice of reflections for refinement.  R-factors based
 on F^2^ are statistically about twice as large as those based on F, and R-
 factors based on ALL data will be even larger.
;
 
_refine_ls_structure_factor_coef  Fsqd
_refine_ls_matrix_type            full
_refine_ls_weighting_scheme       calc
_refine_ls_weighting_details
 'calc w=1/[\s^2^(Fo^2^)+(0.0456P)^2^]'
_atom_sites_solution_primary      direct
_atom_sites_solution_secondary    difmap
_atom_sites_solution_hydrogens    geom
_refine_ls_hydrogen_treatment     constr
_refine_ls_extinction_method      none
_refine_ls_extinction_coef        ?
_refine_ls_number_reflns          468
_refine_ls_number_parameters      35
_refine_ls_number_restraints      6
_refine_ls_R_factor_all           0.0919
_refine_ls_R_factor_gt            0.0452
_refine_ls_wR_factor_ref          0.0919
_refine_ls_wR_factor_gt           0.0858
_refine_ls_goodness_of_fit_ref    0.835
_refine_ls_restrained_S_all       0.831
_refine_ls_shift/su_max           0.000
_refine_ls_shift/su_mean          0.000
 
loop_
 _atom_site_label
 _atom_site_type_symbol
 _atom_site_fract_x
 _atom_site_fract_y
 _atom_site_fract_z
 _atom_site_U_iso_or_equiv
 _atom_site_adp_type
 _atom_site_occupancy
 _atom_site_symmetry_multiplicity
 _atom_site_calc_flag
 _atom_site_refinement_flags
 _atom_site_disorder_assembly
 _atom_site_disorder_group
Cu1 Cu 0.0000 0.0000 0.5000 0.0483(6) Uani 1 8 d S . .
O1 O -0.2998(5) -0.1328(3) 0.5000 0.0534(10) Uani 1 2 d S A .
C1 C -0.5000 -0.0758(7) 0.5000 0.0362(17) Uani 1 4 d S . .
N11 N 0.0000 0.0159(13) 0.6505(4) 0.0358(17) Uiso 0.50 2 d SP A -1
C12 C 0.0000 0.1287(17) 0.6967(10) 0.058(6) Uiso 0.50 2 d SP A -1
H12 H 0.0000 0.2040 0.6581 0.069 Uiso 0.50 2 calc SPR A -1
C13 C 0.0000 0.1431(16) 0.7994(10) 0.078(6) Uiso 0.50 2 d SP A -1
H13 H 0.0000 0.2253 0.8288 0.094 Uiso 0.50 2 calc SPR A -1
C14 C 0.0000 0.0286(10) 0.8574(6) 0.048(3) Uiso 0.50 2 d SP A -1
C15 C 0.0000 -0.0924(15) 0.8095(8) 0.051(4) Uiso 0.50 2 d SP A -1
H15 H 0.0000 -0.1700 0.8454 0.061 Uiso 0.50 2 calc SPR A -1
C16 C 0.0000 -0.0922(17) 0.7041(8) 0.050(6) Uiso 0.50 2 d SP A -1
H16 H 0.0000 -0.1720 0.6711 0.061 Uiso 0.50 2 calc SPR A -1
C17 C 0.0000 0.0484(9) 0.9687(6) 0.070(4) Uiso 0.50 2 d SP A -1
H17 H 0.0000 0.1495 1.0000 0.084 Uiso 1 4 d S B -1
 
loop_
 _atom_site_aniso_label
 _atom_site_aniso_U_11
 _atom_site_aniso_U_22
 _atom_site_aniso_U_33
 _atom_site_aniso_U_23
 _atom_site_aniso_U_13
 _atom_site_aniso_U_12
Cu1 0.0294(8) 0.0880(13) 0.0276(7) 0.000 0.000 0.000
O1 0.0248(18) 0.080(3) 0.056(2) 0.000 0.000 0.0088(18)
C1 0.019(4) 0.069(5) 0.021(3) 0.000 0.000 0.000
 
_geom_special_details
;
 All esds (except the esd in the dihedral angle between two l.s. planes)
 are estimated using the full covariance matrix.  The cell esds are taken
 into account individually in the estimation of esds in distances, angles
 and torsion angles; correlations between esds in cell parameters are only
 used when they are defined by crystal symmetry.  An approximate (isotropic)
 treatment of cell esds is used for estimating esds involving l.s. planes.
;
 
loop_
 _geom_bond_atom_site_label_1
 _geom_bond_atom_site_label_2
 _geom_bond_distance
 _geom_bond_site_symmetry_2
 _geom_bond_publ_flag
Cu1 N11 2.029(5) 10_556 ?
Cu1 N11 2.029(5) 9_556 ?
Cu1 N11 2.029(5) 2 ?
Cu1 N11 2.029(5) . ?
Cu1 O1 2.140(3) 9_556 ?
Cu1 O1 2.140(3) . ?
Cu1 O1 2.140(3) 3_556 ?
Cu1 O1 2.140(3) 11 ?
O1 C1 1.248(5) . ?
C1 O1 1.248(5) 11_455 ?
C1 C1 1.553(14) 9_456 ?
N11 C12 1.312(12) . ?
N11 C16 1.321(12) . ?
C12 C13 1.387(12) . ?
C12 H12 0.9300 . ?
C13 C14 1.408(14) . ?
C13 H13 0.9300 . ?
C14 C15 1.396(14) . ?
C14 C17 1.509(11) . ?
C15 C16 1.416(11) . ?
C15 H15 0.9300 . ?
C16 H16 0.9300 . ?
C17 H17 1.1177 . ?
 
loop_
 _geom_angle_atom_site_label_1
 _geom_angle_atom_site_label_2
 _geom_angle_atom_site_label_3
 _geom_angle
 _geom_angle_site_symmetry_1
 _geom_angle_site_symmetry_3
 _geom_angle_publ_flag
N11 Cu1 N11 9.2(7) 10_556 9_556 ?
N11 Cu1 N11 180.000(1) 10_556 2 ?
N11 Cu1 N11 170.8(7) 9_556 2 ?
N11 Cu1 N11 170.8(7) 10_556 . ?
N11 Cu1 N11 180.000(1) 9_556 . ?
N11 Cu1 N11 9.2(7) 2 . ?
N11 Cu1 O1 87.1(2) 10_556 9_556 ?
N11 Cu1 O1 92.9(2) 9_556 9_556 ?
N11 Cu1 O1 92.9(2) 2 9_556 ?
N11 Cu1 O1 87.1(2) . 9_556 ?
N11 Cu1 O1 92.9(2) 10_556 . ?
N11 Cu1 O1 87.1(2) 9_556 . ?
N11 Cu1 O1 87.1(2) 2 . ?
N11 Cu1 O1 92.9(2) . . ?
O1 Cu1 O1 180.00(15) 9_556 . ?
N11 Cu1 O1 87.1(2) 10_556 3_556 ?
N11 Cu1 O1 92.9(2) 9_556 3_556 ?
N11 Cu1 O1 92.9(2) 2 3_556 ?
N11 Cu1 O1 87.1(2) . 3_556 ?
O1 Cu1 O1 101.06(18) 9_556 3_556 ?
O1 Cu1 O1 78.94(18) . 3_556 ?
N11 Cu1 O1 92.9(2) 10_556 11 ?
N11 Cu1 O1 87.1(2) 9_556 11 ?
N11 Cu1 O1 87.1(2) 2 11 ?
N11 Cu1 O1 92.9(2) . 11 ?
O1 Cu1 O1 78.94(18) 9_556 11 ?
O1 Cu1 O1 101.06(18) . 11 ?
O1 Cu1 O1 180.000(1) 3_556 11 ?
C1 O1 Cu1 112.6(4) . . ?
O1 C1 O1 124.2(7) 11_455 . ?
O1 C1 C1 117.9(3) 11_455 9_456 ?
O1 C1 C1 117.9(3) . 9_456 ?
C12 N11 C16 118.7(10) . . ?
C12 N11 Cu1 122.8(10) . . ?
C16 N11 Cu1 118.5(8) . . ?
N11 C12 C13 124.4(15) . . ?
N11 C12 H12 117.8 . . ?
C13 C12 H12 117.8 . . ?
C12 C13 C14 117.5(14) . . ?
C12 C13 H13 121.3 . . ?
C14 C13 H13 121.3 . . ?
C15 C14 C13 119.0(9) . . ?
C15 C14 C17 125.2(8) . . ?
C13 C14 C17 115.9(9) . . ?
C14 C15 C16 117.3(13) . . ?
C14 C15 H15 121.3 . . ?
C16 C15 H15 121.3 . . ?
N11 C16 C15 123.1(14) . . ?
N11 C16 H16 118.4 . . ?
C15 C16 H16 118.4 . . ?
C14 C17 H17 119.8 . . ?
 
loop_
 _geom_hbond_atom_site_label_D
 _geom_hbond_atom_site_label_H
 _geom_hbond_atom_site_label_A
 _geom_hbond_distance_DH
 _geom_hbond_distance_HA
 _geom_hbond_distance_DA
 _geom_hbond_angle_DHA
 _geom_hbond_site_symmetry_A
C13 H13 O1  0.93 2.94 3.708(15) 141.3 8_456
C13 H13 O1  0.93 2.94 3.708(15) 141.3 5
C15 H15 O1  0.93 3.10 3.960(14) 154.8 6_445
C15 H15 O1  0.93 3.10 3.960(14) 154.8 7_546
C17 H17 O1  1.12 2.49 3.472(10) 146.1 8_456
C17 H17 O1  1.12 2.49 3.472(10) 146.1 5
 
_diffrn_measured_fraction_theta_max    0.949
_diffrn_reflns_theta_full              26.85
_diffrn_measured_fraction_theta_full   0.949
_refine_diff_density_max    0.337
_refine_diff_density_min   -0.355
_refine_diff_density_rms    0.075

#===END
